# Supplementary material for: An efficient method for selective oxidation of 1,2-diols in water catalyzed by Me2SnCl2
Source: Royal Society of Chemistry journal article supplement (doi:10.1039/c3ra42754d), 2013-01-01

## Electronic Supplementary Information (ESI)

### Efficient Method for Selective Oxidation of 1,2-Diols in Water Catalyzed by $\text{Me}_2\text{SnCl}_2$

Julius M. William, Masami Kuriyama, and Osamu Onomura\*

Graduate School of Biomedical Sciences, Nagasaki University, 1-14 Bunkyo-machi, Nagasaki 852-8521, Japan

#### Table of contents:

|                                                      |        |
|------------------------------------------------------|--------|
| 1. General information                               | S1     |
| 2. General Synthetic procedure                       | S1     |
| 3. Characterization of 2                             | S2-S4  |
| 4. References                                        | S4     |
| 5. $^1\text{H}$ and $^{13}\text{C}$ NMR spectra of 2 | S5-S30 |

#### General

All melting points are not corrected.  $^1\text{H}$  NMR spectra were taken at 400 MHz and  $^{13}\text{C}$  NMR spectra were taken at 100 MHz. Chemical shift values are expressed in ppm relative to internal or external TMS. Abbreviations are as follows: s, singlet; d, doublet; t, triplet; q, quartet; m, multiplet; br, broad. Mass spectra (MS) and high-resolution mass spectra (HRMS) were recorded using electron ionization (EI) or fast atom bombardment (FAB) mass spectrometry. The products were isolated by silica gel column chromatography. All reagents and solvents were of high purity and used as supplied.

All reagents and solvents were of high purity and used as supplied. Diols **1c-i**, **1k-o**, triol **1p**, and mono-ol **1q**, are commercially available. Diols **1a** and **1b** were prepared by osmium oxidation of their corresponding alkenes, through Sharpless dihydroxylation procedure.  $\alpha$ -Hydroxyketones **2a**,<sup>1</sup> **2b**,<sup>1</sup> **2c**,<sup>2</sup> **2d**,<sup>2</sup> **2h**,<sup>3</sup> **2j**,<sup>4</sup> **2k**,<sup>5</sup> **2l**,<sup>6</sup> **2n**,<sup>7</sup> **2o**,<sup>8</sup> **2p**,<sup>9</sup> and ketone **2q**<sup>10</sup> are known compounds.

#### 2. General Procedure for selective oxidation of 1,2-diols in water using $\text{Br}_2$ as an oxidant

Bromine (1.5 mmol) was added dropwise at 0 °C under dark conditions to a solution of 1,2-diol **1a** (1.0 mmol),  $\text{Me}_2\text{SnCl}_2$  (0.1 mmol), and  $\text{K}_2\text{CO}_3$  (1.2 mmol) in water (5 mL). After the reaction mixture had been stirred for 30 min, aqueous sat.  $\text{Na}_2\text{S}_2\text{O}_3$  (10 mL) was added. The organic portion was extracted with AcOEt (3 x 40 mL) and then dried over anhydrous  $\text{MgSO}_4$ . The solvent was removed in vacuo and the residue was subjected to silica-gel column chromatography (n-hexane/AcOEt 5:1) to afford (129.3 mg, 91% yield) of product **2a**.

#### 3. General Procedure for selective oxidation of 1,2-diols in water using DBI as an oxidant

DBI (1.0 mmol) was added at 0 °C under dark conditions to a solution of 1,2-diol **1a** (1.0 mmol) and  $\text{Me}_2\text{SnCl}_2$  (0.1 mmol), and  $\text{K}_2\text{CO}_3$  (1.2 mmol) in water (5 mL). After the reaction mixture had been stirred for 1 h, aqueous sat.  $\text{Na}_2\text{S}_2\text{O}_3$  (10 mL) was added. The organic portion was extracted with AcOEt (3 x 40 mL) and then dried over  $\text{MgSO}_4$ . The solvent was removed in vacuo and the residue was subjected to silica-gel column chromatography (n-hexane/AcOEt 5:1) to afford (127mg, 90% yield) of product **2a**.

#### 4. Characterization of 2

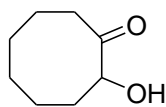

**2a**

**2-Hydroxycyclooctanone (2a)** (Table 1): Waxy solid; mp 114–118 °C.  $^1\text{H-NMR}$  (400 MHz,  $\text{CDCl}_3$ )  $\delta$  0.78–1.04 (m, 1 H), 1.30–1.48 (m, 2 H), 1.57–1.89 (m, 4 H), 1.89–2.13 (m, 2 H), 2.23–2.48 (m, 2 H), 2.72 (td,  $J=12.21, 3.91$  Hz, 1 H), 3.76 (br. s, 1 H), 4.19 (dd,  $J=6.35, 2.69$  Hz, 1 H).  $^{13}\text{C-NMR}$  (100 MHz,  $\text{CDCl}_3$ )  $\delta$  22.00, 24.36, 25.37, 28.53, 29.17, 37.16, 76.08, 217.4.

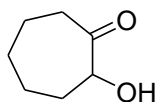

**2b**

**2-Hydroxycycloheptanone (2b)** (Table 4, entry 1): Yellow oil.  $^1\text{H-NMR}$  (400 MHz,  $\text{CDCl}_3$ )  $\delta$  1.27–1.43 (m, 1 H), 1.52–2.13 (m, 7 H), 2.47 (ddd,  $J=17.33, 11.11, 3.54$  Hz, 1 H), 2.61–2.79 (m, 1 H), 3.86 (d,  $J=3.66$  Hz, 1 H), 4.21–4.40 (m, 1 H).  $^{13}\text{C-NMR}$  (100 MHz,  $\text{CDCl}_3$ )  $\delta$  23.43, 26.61, 29.51, 33.76, 40.06, 77.03, 213.81.

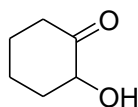

**2c**

**2-Hydroxycyclohexanone (2c)** (Table 4, entry 2): Colorless oil.  $^1\text{H-NMR}$  (400 MHz,  $\text{CDCl}_3$ )  $\delta$  1.40–2.00 (m, 4 H), 2.04–2.21 (m, 1 H), 2.28–2.67 (m, 3 H), 3.68 (br. s, 1 H), 4.13 (dd,  $J=11.84, 6.71$  Hz, 1 H).  $^{13}\text{C-NMR}$  (100 MHz,  $\text{CDCl}_3$ )  $\delta$  23.33, 27.52, 36.67, 39.44, 75.30, 211.35.

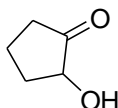

**2d**

**2-Hydroxycyclopentanone (2d)** (Table 4, entry 3): Colorless oil.  $^1\text{H-NMR}$  (400 MHz,  $\text{CDCl}_3$ )  $\delta$  1.45–2.74 (m, 6 H), 3.16 (br. s, 1 H), 3.84–4.26 (m, 1 H).  $^{13}\text{C-NMR}$  (100 MHz,  $\text{CDCl}_3$ )  $\delta$  16.26, 30.58, 33.91, 75.82, 218.43.

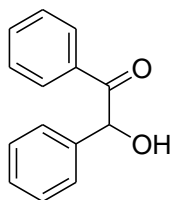

**2h**

**Benzoin (2h)** (Table 4, entry 7): White solid; mp 136–137 °C.  $^1\text{H-NMR}$  (400 MHz,  $\text{CDCl}_3$ )  $\delta$  4.56 (d,  $J=6.10$  Hz, 1 H), 5.96 (d,  $J=6.10$  Hz, 1 H), 7.22–7.36 (m, 5 H), 7.37–7.44 (m, 2 H), 7.48–7.58 (m, 1 H), 7.88–7.96 (m, 2 H).  $^{13}\text{C-NMR}$  (100 MHz,  $\text{CDCl}_3$ )  $\delta$  76.18, 127.74 (2C), 128.54, 128.65 (2C), 129.09, 129.11 (2C), 133.44, 133.87 (2C), 138.97, 198.91.

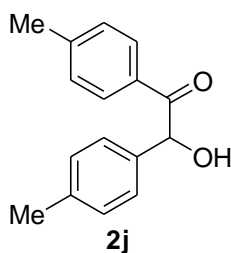

**4,4-Dimethylbenzoin (2j)** (Table 4, entry 9): White solid; mp 89–90 °C.  $^1\text{H-NMR}$  (400 MHz,  $\text{CDCl}_3$ )  $\delta$  2.22–2.38 (m, 6 H), 4.57 (d,  $J=6.10$  Hz, 1 H), 5.89 (d,  $J=6.10$  Hz, 1 H), 7.10 (d,  $J=8.06$  Hz, 2 H), 7.13–7.24 (m, 4 H), 7.66–7.97 (m, 2 H).  $^{13}\text{C-NMR}$  (100 MHz,  $\text{CDCl}_3$ )  $\delta$  21.05, 2161, 75.72, 127.57 (2C), 129.19 (2C), 129.27 (2C), 129.68, 130.88, 136.32, 138.21, 144.79, 198.47.

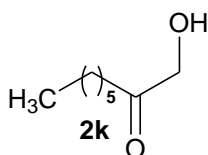

**1-Hydroxyoctan-2-one (2k)** (Table 4, entry 10): Colorless oil.  $^1\text{H-NMR}$  (400 MHz,  $\text{CDCl}_3$ )  $\delta$  0.79–0.95 (m, 3 H), 1.20–1.38 (m, 6 H), 1.52–1.70 (m, 2 H), 2.41 (t,  $J=7.45$  Hz, 2 H), 3.24 (br. s, 1 H), 4.24 (s, 2 H).  $^{13}\text{C-NMR}$  (100 MHz,  $\text{CDCl}_3$ )  $\delta$  13.76, 22.24, 23.46, 28.67, 31.28, 38.19, 67.89, 209.91.

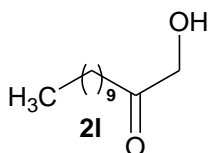

**1-Hydroxydodecan-2-one (2l)** (Table 4, entry 11): White solid; mp 52–53 °C.  $^1\text{H-NMR}$  (400 MHz,  $\text{CDCl}_3$ )  $\delta$  0.88 (t,  $J=6.84$  Hz, 3 H), 1.14–1.41 (m, 15 H), 1.55–1.76 (m, 3 H), 2.41 (t,  $J=7.57$  Hz, 2 H), 3.13 (br. s, 1 H), 4.24 (d,  $J=2.93$  Hz, 2 H).  $^{13}\text{C-NMR}$  (100 MHz,  $\text{CDCl}_3$ )  $\delta$  14.07, 22.64, 23.72, 29.18, 29.25, 29.26, 29.38, 29.50, 31.84, 38.42, 68.05, 209.88.

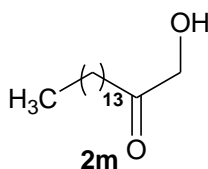

**1-Hydroxyhexadecan-2-one (2m)** (Table 4, entry 12): White solid; mp 72–73 °C. IR (neat) 3347, 2914, 2847, 1462, 1375, 1070, 993, 717 $\text{cm}^{-1}$ ;  $^1\text{H-NMR}$  (400 MHz,  $\text{CDCl}_3$ )  $\delta$  0.88 (t,  $J=6.84$  Hz, 3 H), 1.12–1.37 (m, 22 H), 1.53–1.74 (m, 2 H), 2.41 (t,  $J=7.45$  Hz, 2 H), 3.13 (t,  $J=4.64$  Hz, 1 H), 4.24 (d,  $J=4.39$  Hz, 2 H).  $^{13}\text{C-NMR}$  (100 MHz,  $\text{CDCl}_3$ )  $\delta$  14.09, 22.67, 23.72, 29.18, 29.27, 29.33, 29.38, 29.55, 29.60, 29.62, 29.63, 29.65, 31.90, 38.42, 68.06, 209.88. HRMS calcd for  $\text{C}_{16}\text{H}_{32}\text{O}_2$  ( $\text{M}^+$ ): 256.2402, found, 256.2394.

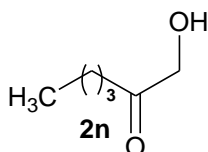

**1-Hydroxyhexan-2-one (2n)** (Table 4, entry 13): Colorless oil.  $^1\text{H-NMR}$  (400 MHz,  $\text{CDCl}_3$ )  $\delta$  0.92 (t,  $J=7.45$  Hz, 3 H), 1.34 (dq,  $J=14.95$ , 7.39 Hz, 2 H), 1.62 (quin,  $J=7.57$  Hz, 2 H), 2.42 (t,  $J=7.45$  Hz, 2 H), 3.28 (br. s, 1 H), 4.25 (d,  $J=1.95$  Hz, 2 H).  $^{13}\text{C-NMR}$  (100 MHz,  $\text{CDCl}_3$ )  $\delta$  13.58, 22.16, 25.60, 37.96, 67.94, 209.87.

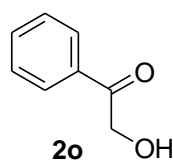

**2-Hydroxy-1-phenylethanone (2o)** (Table 4, entry 14): White solid; 86–88°C. <sup>1</sup>H-NMR (400 MHz, CDCl<sub>3</sub>) δ 3.53 (t, *J*=4.27 Hz, 1 H), 4.89 (d, *J*=4.15 Hz, 2 H), 7.45–7.58 (m, 2 H), 7.58–7.71 (m, 1 H), 7.93 (d, *J*=7.57 Hz, 2 H). <sup>13</sup>C-NMR (100 MHz, CDCl<sub>3</sub>) δ 65.46, 127.66 (2C), 128.94 (2C), 133.34, 134.27, 198.37.

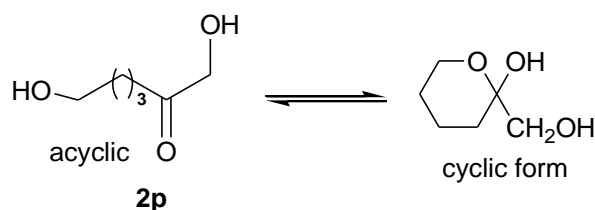

**1,6-Dihydroxyhexan-2-one (2p) exist in (mixture of open-chain and cyclic form)**<sup>9</sup> (Table 4, entry 15): Colorless oil. <sup>13</sup>C-NMR (100 MHz, CDCl<sub>3</sub>) δ acyclic form 6: 19.76 (C(4)), 31.68 (C(5)), 37.80 (C(3)), 61.85 (C(6)), 67.96 (C(1)), 210.07 (C(2)); cyclic form 6: 18.16 (C(4)), 25.20 (C(5)), 30.34 (C(3)), 61.07 (C(6)), 69.00 (C(1)), 95.05 (C(2)).

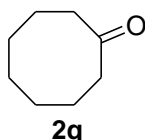

**Cyclooctanone (2q)** (Scheme 2): Yellow oil. <sup>1</sup>H-NMR (400 MHz, CDCl<sub>3</sub>) δ 1.33–1.44 (m, 1 H), 1.49–1.62 (m, 3 H), 1.62–1.71 (m, 1 H), 1.76–1.97 (m, 4 H), 2.36–2.49 (m, 3 H), 2.56–2.67 (m, 1 H). <sup>13</sup>C-NMR (100 MHz, CDCl<sub>3</sub>) δ 21.14, 24.62, 25.57, 26.34, 27.08, 39.92, 41.85, 218.19.

## References

- 1 W. Chai, A. Takeda, M. Hara, S. J. Ji, C. A. Horiuchi, *Tetrahedron*, 2005, **61**, 2453.
- 2 A. K. El-Qisairi, H. A. Qaseer, *J. Organomet. Chem.*, 2002, **659**, 50.
- 3 O. Onomura, H. Arimoto, Y. Matsumura, Y. Demizu, *Tetrahedron Lett.*, 2007, **48**, 8668.
- 4 L. Baragwanath, C. A. Rose, K. Zeitler, S. J. Connon, *J. Org. Chem.*, 2009, **74**, 9214.
- 5 B. Plietker, *Org. Lett.*, 2004, **6**, 289.
- 6 T. Maki, S. Iikawa, G. Mogami, H. Harasawa, Y. Matsumura, O. Onomura. *Chem. Eur J.*, 2009, **15**, 5364.
- 7 Y. Sakata, Y. Ishii, *J. Org. Chem.*, 1991, **56**, 6233.
- 8 K. Surendra, N. S. Krishnaveni, M. A. Reddy, Y. V. D. Nageswar, K. R. Rao, *J. Org. Chem.*, 2003, **5**, 2058.
- 9 W. A. Szarek, O. R. Martin, R. J. Rafka, T. S. Cameron, *Can. J. Chem.*, 1985, **63**, 1222.
- 10 R. Ben-Daniel, P. Alsters, R. Neumann, *J. Org. Chem.*, 2001, **66**, 8650.

Proton and Carbon NMR spectra

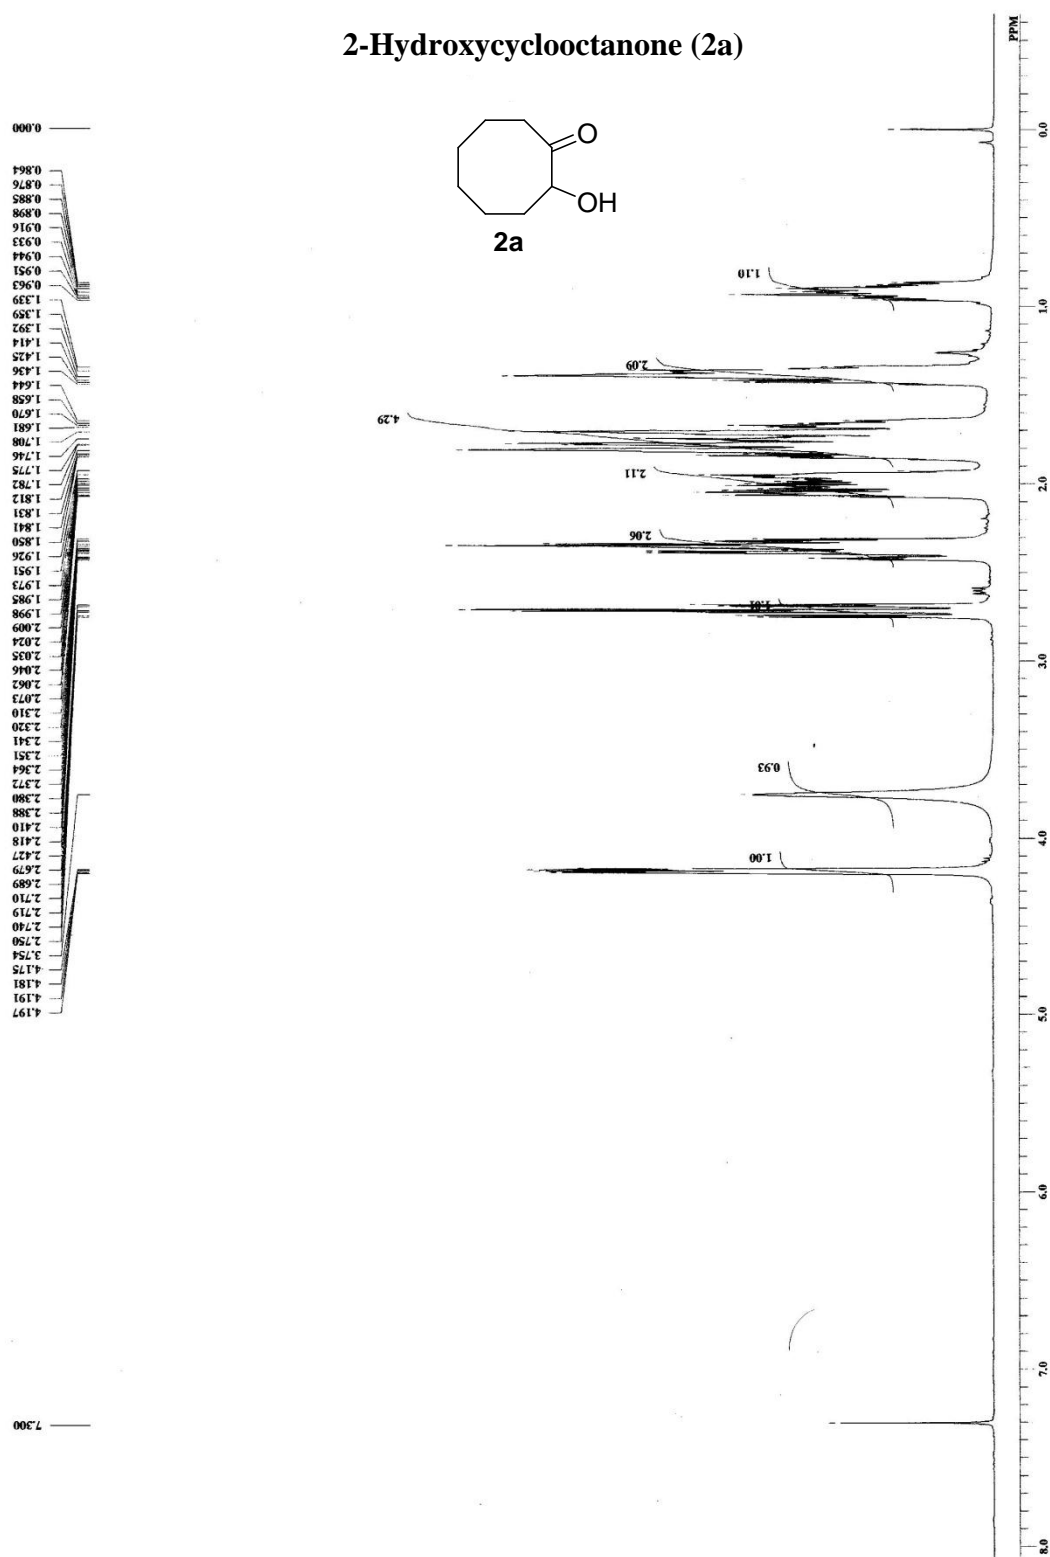

## 2-Hydroxycyclooctanone (2a)

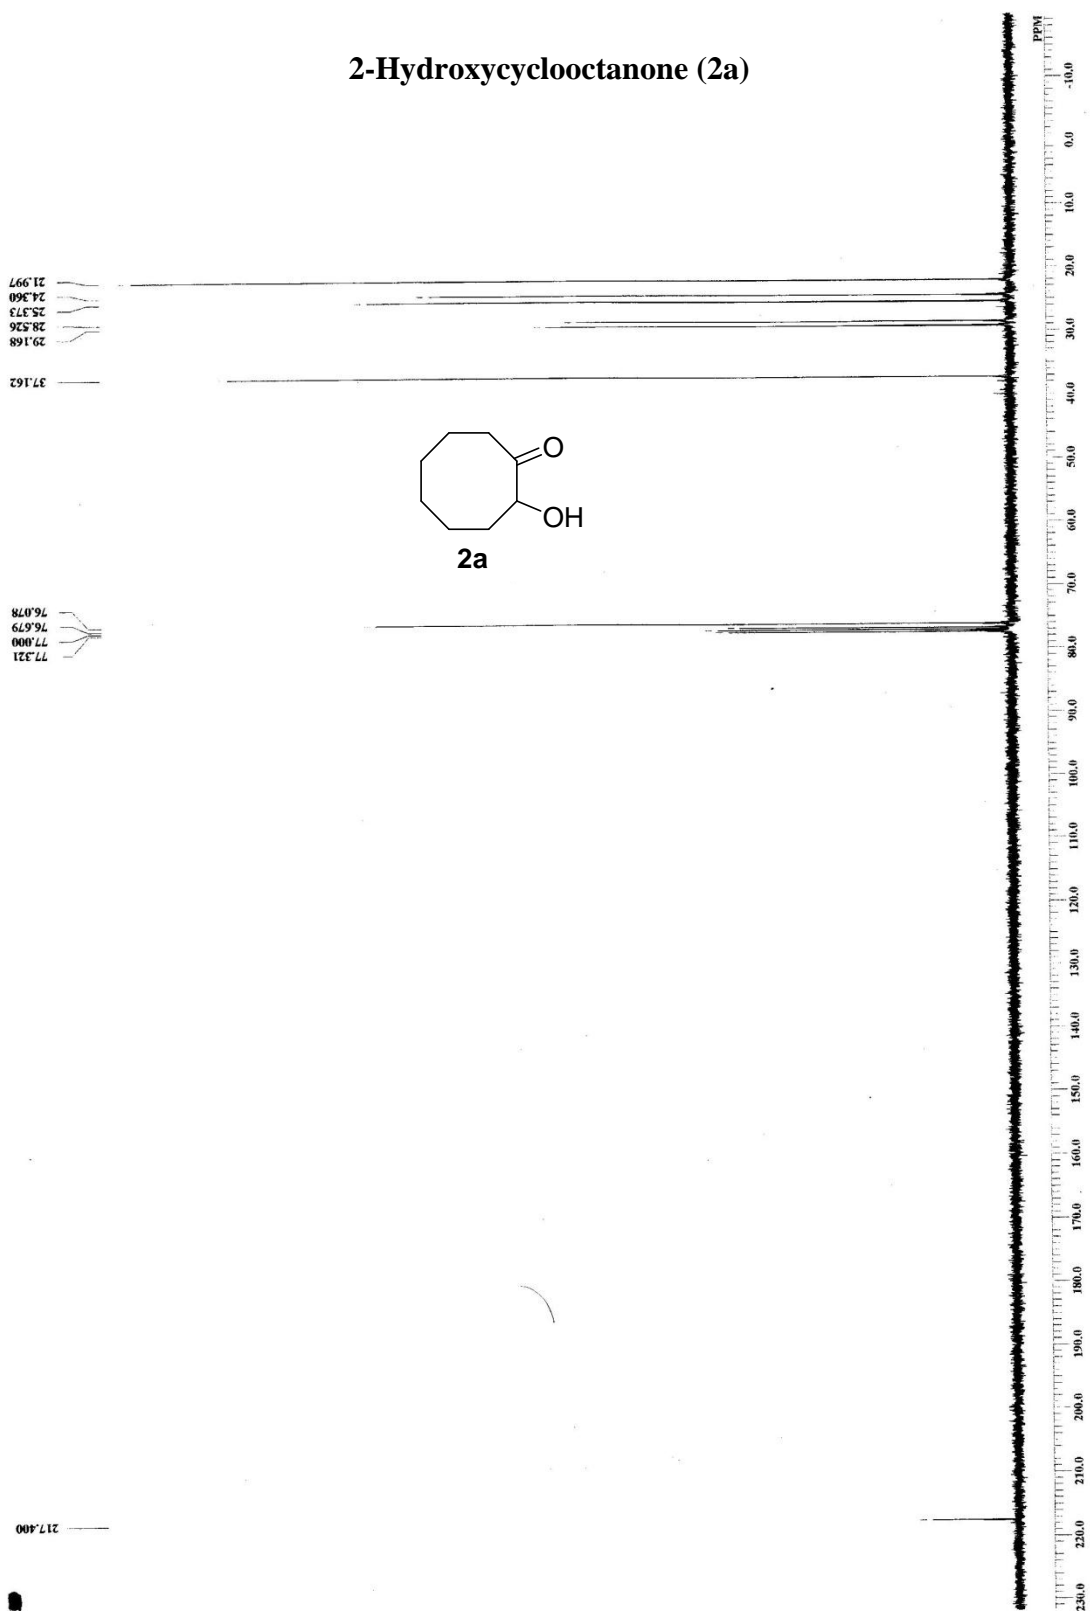

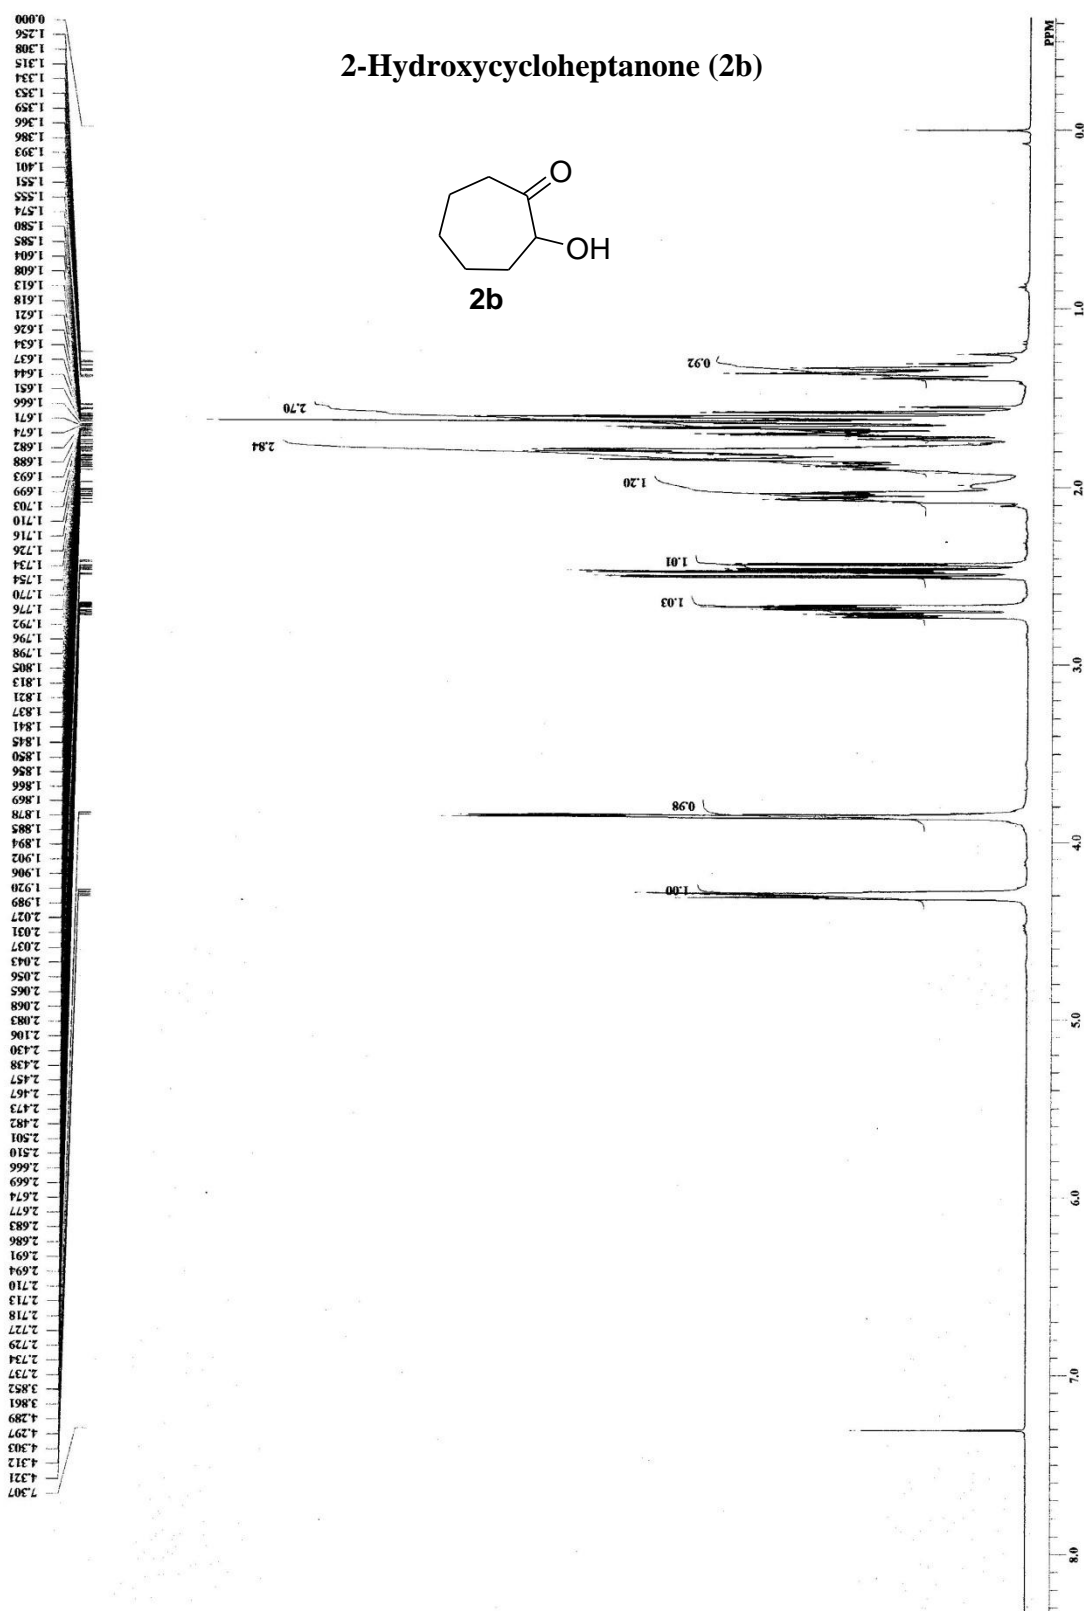

## 2-Hydroxycycloheptanone (2b)

40.060  
33.762  
29.506  
26.608  
23.430

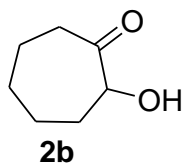

77.321  
77.025  
77.000  
76.687

213.811

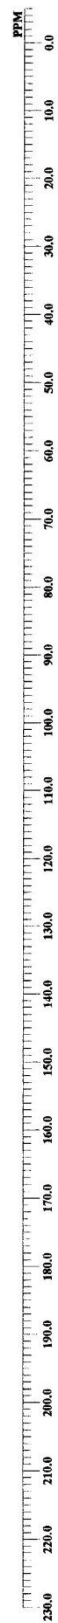



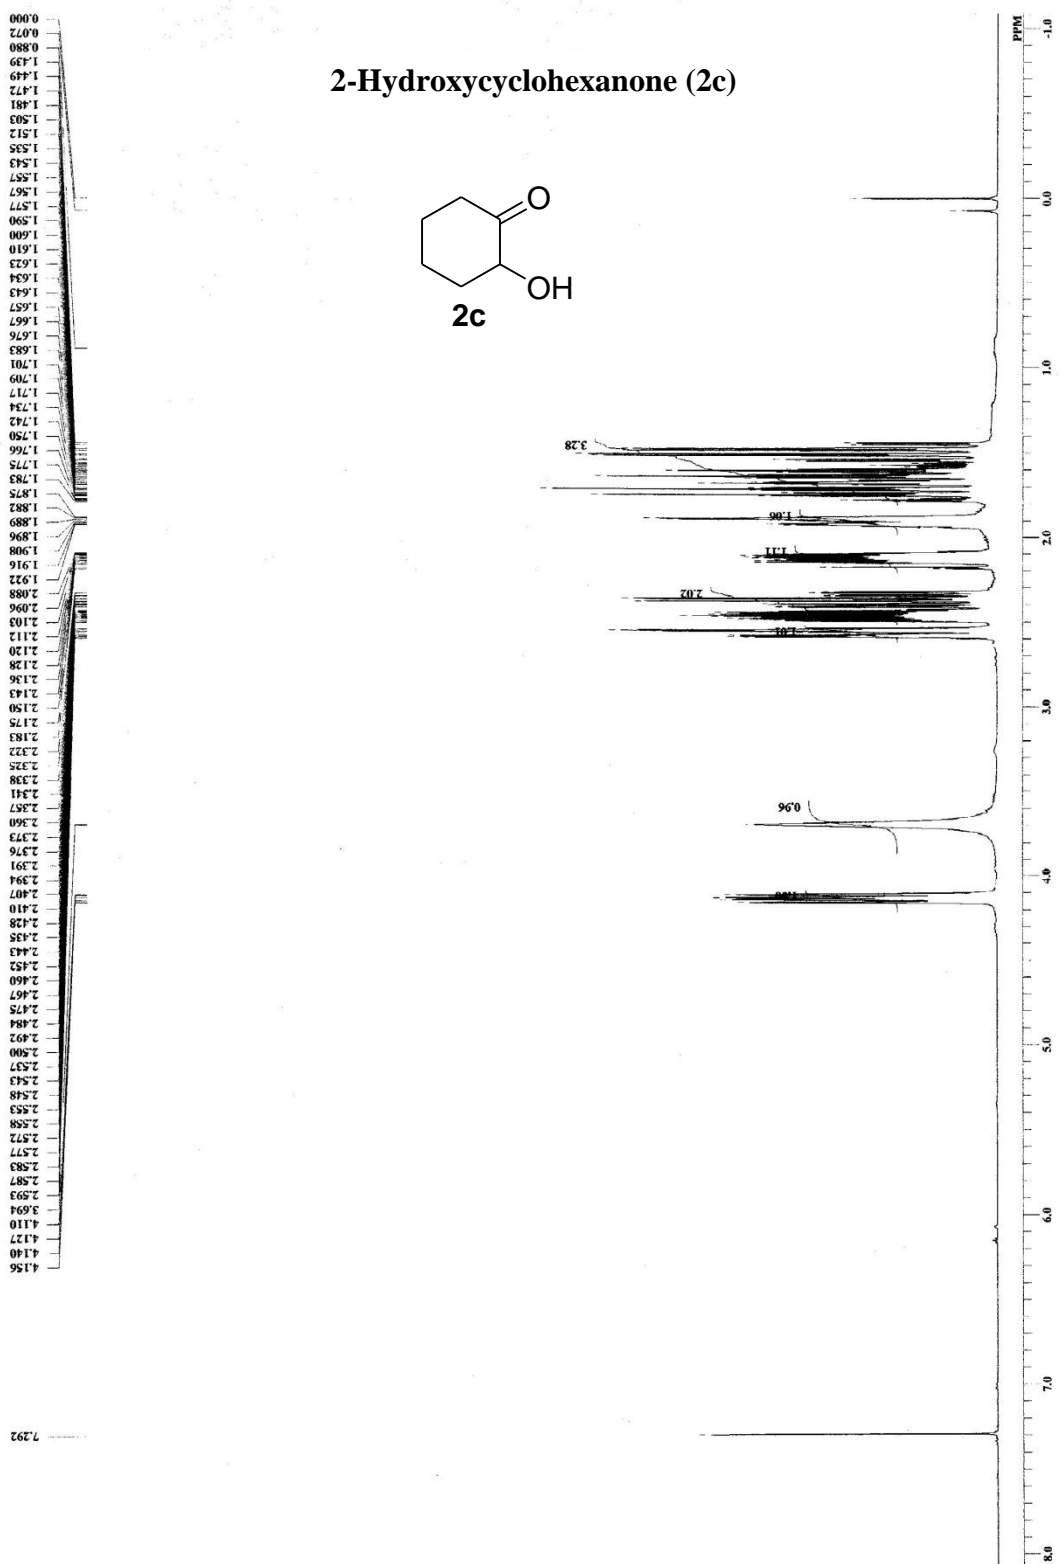

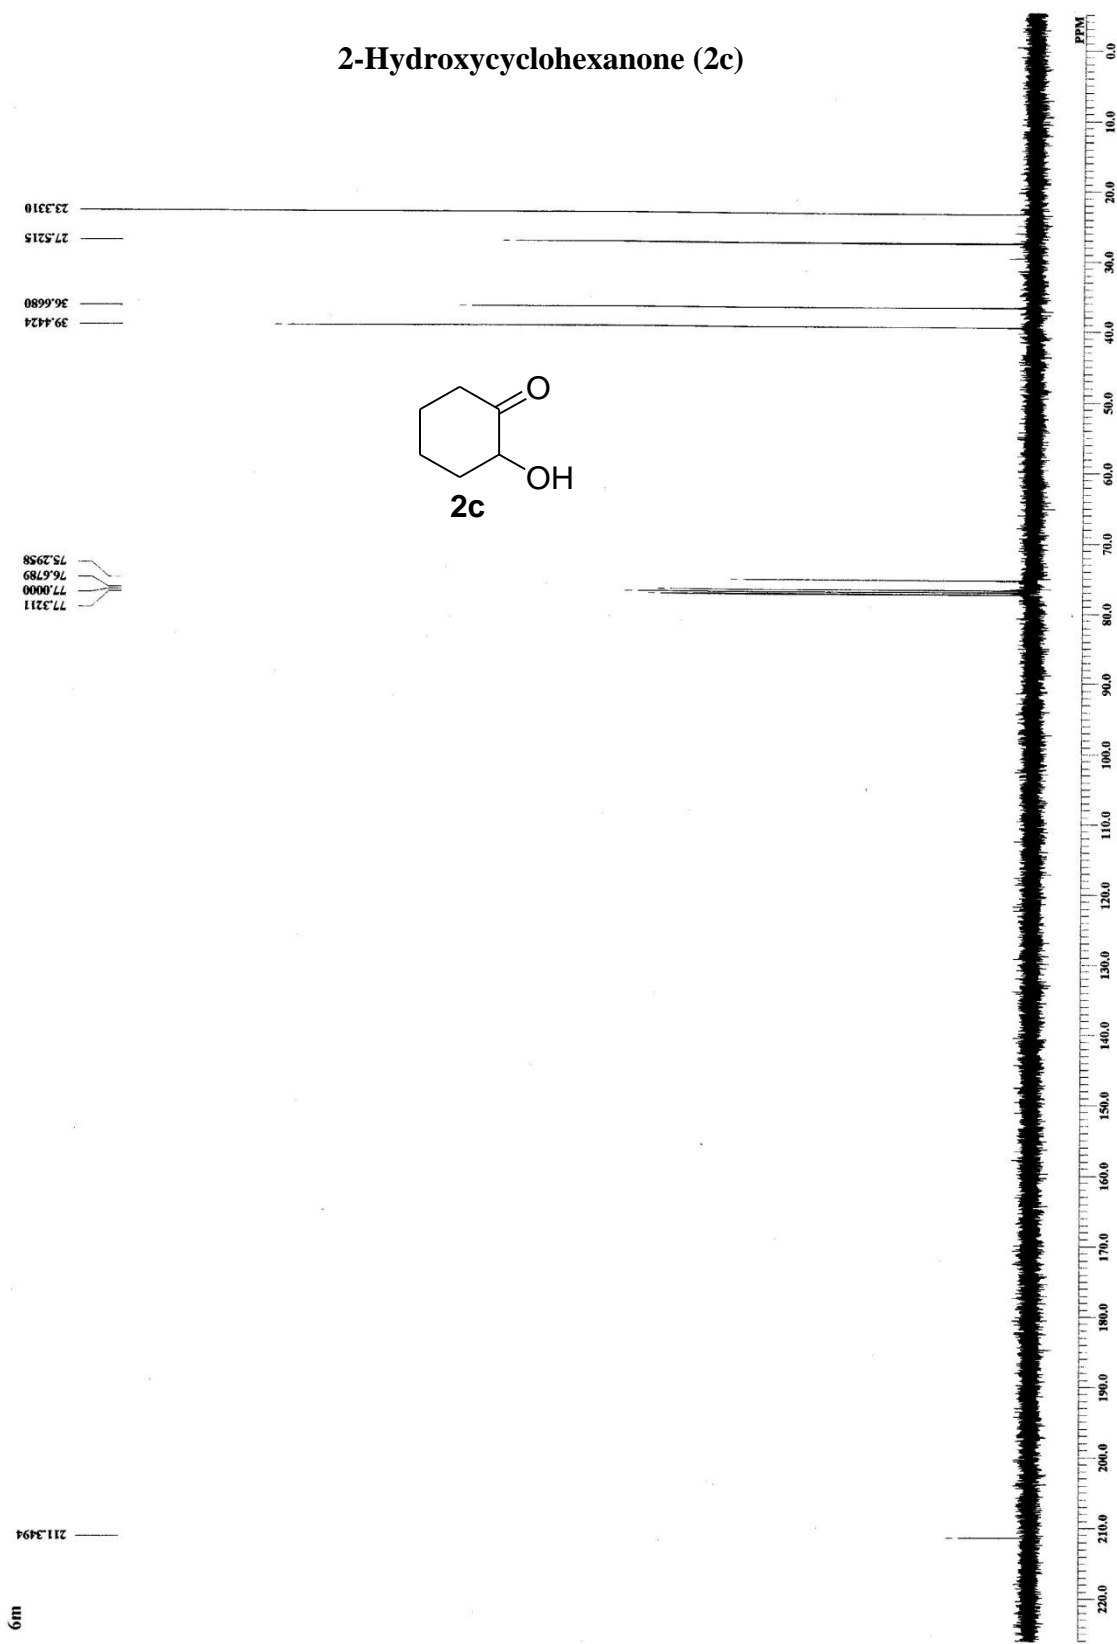

### 2-Hydroxycyclopentanone (2d)

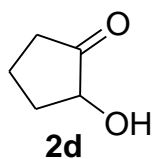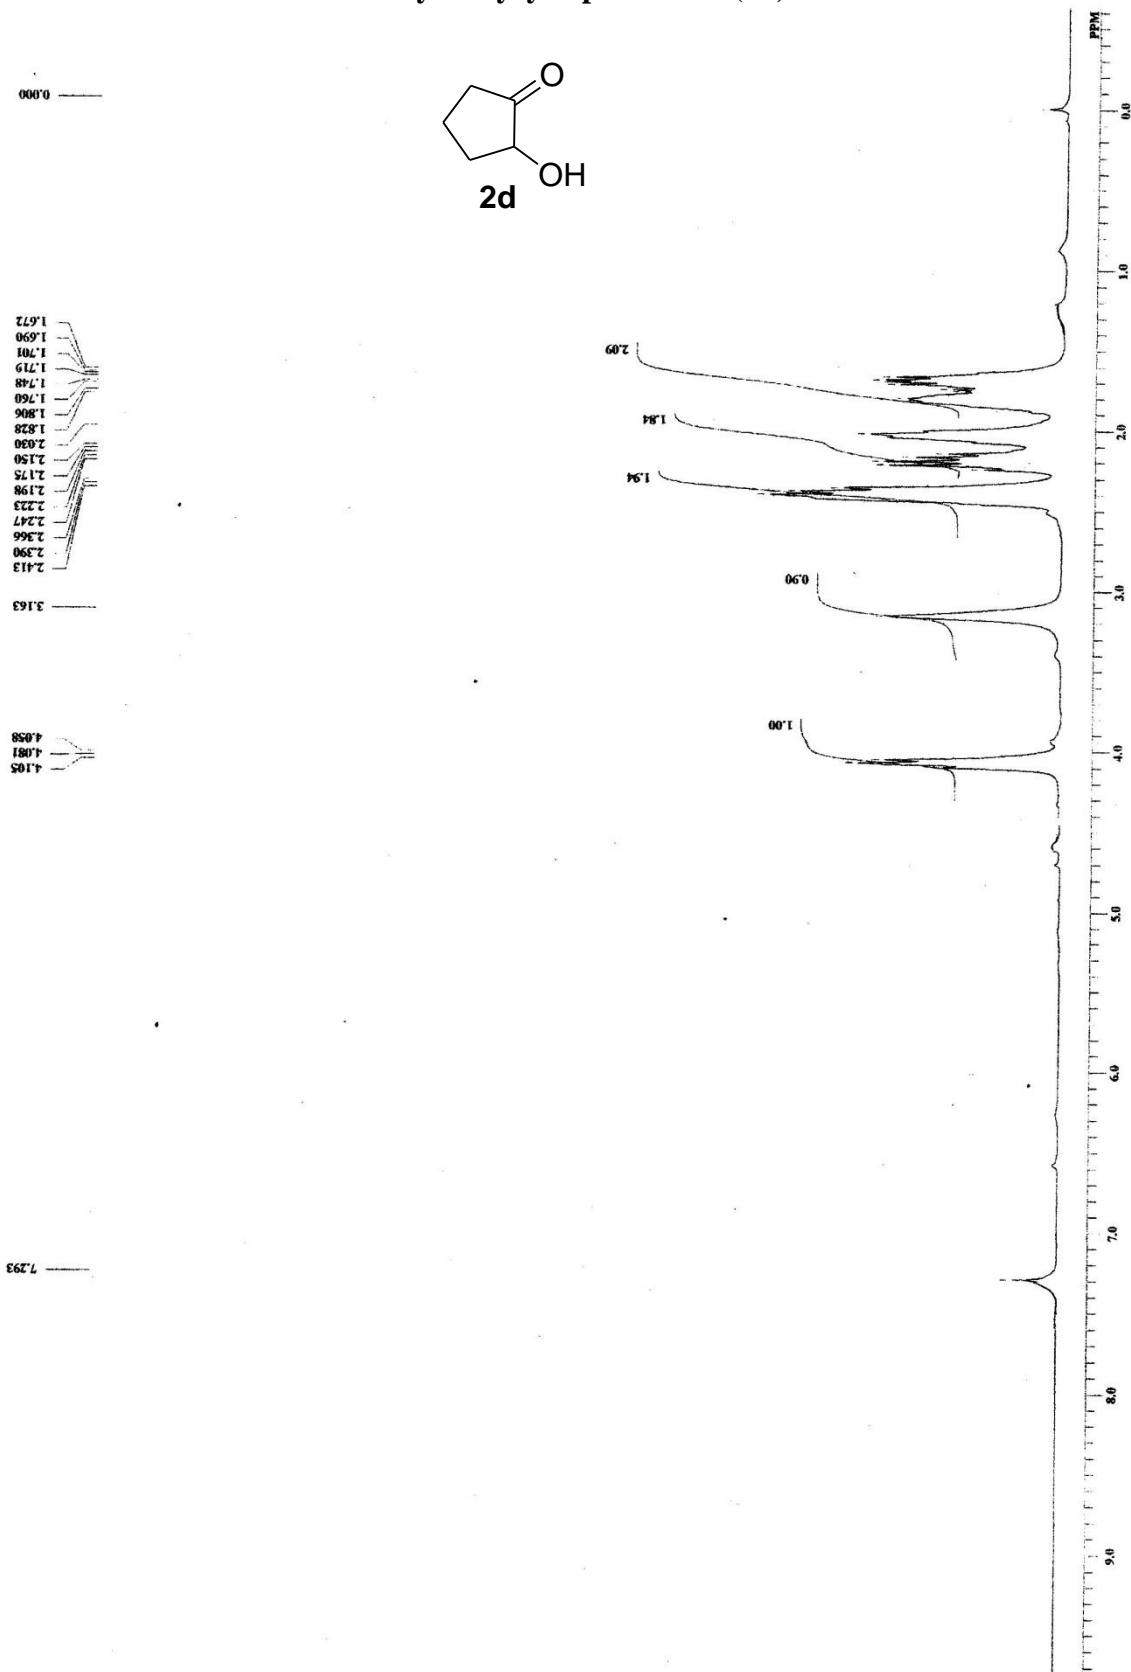

### 2-Hydroxycyclopentanone (2d)

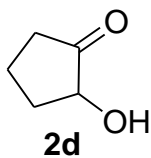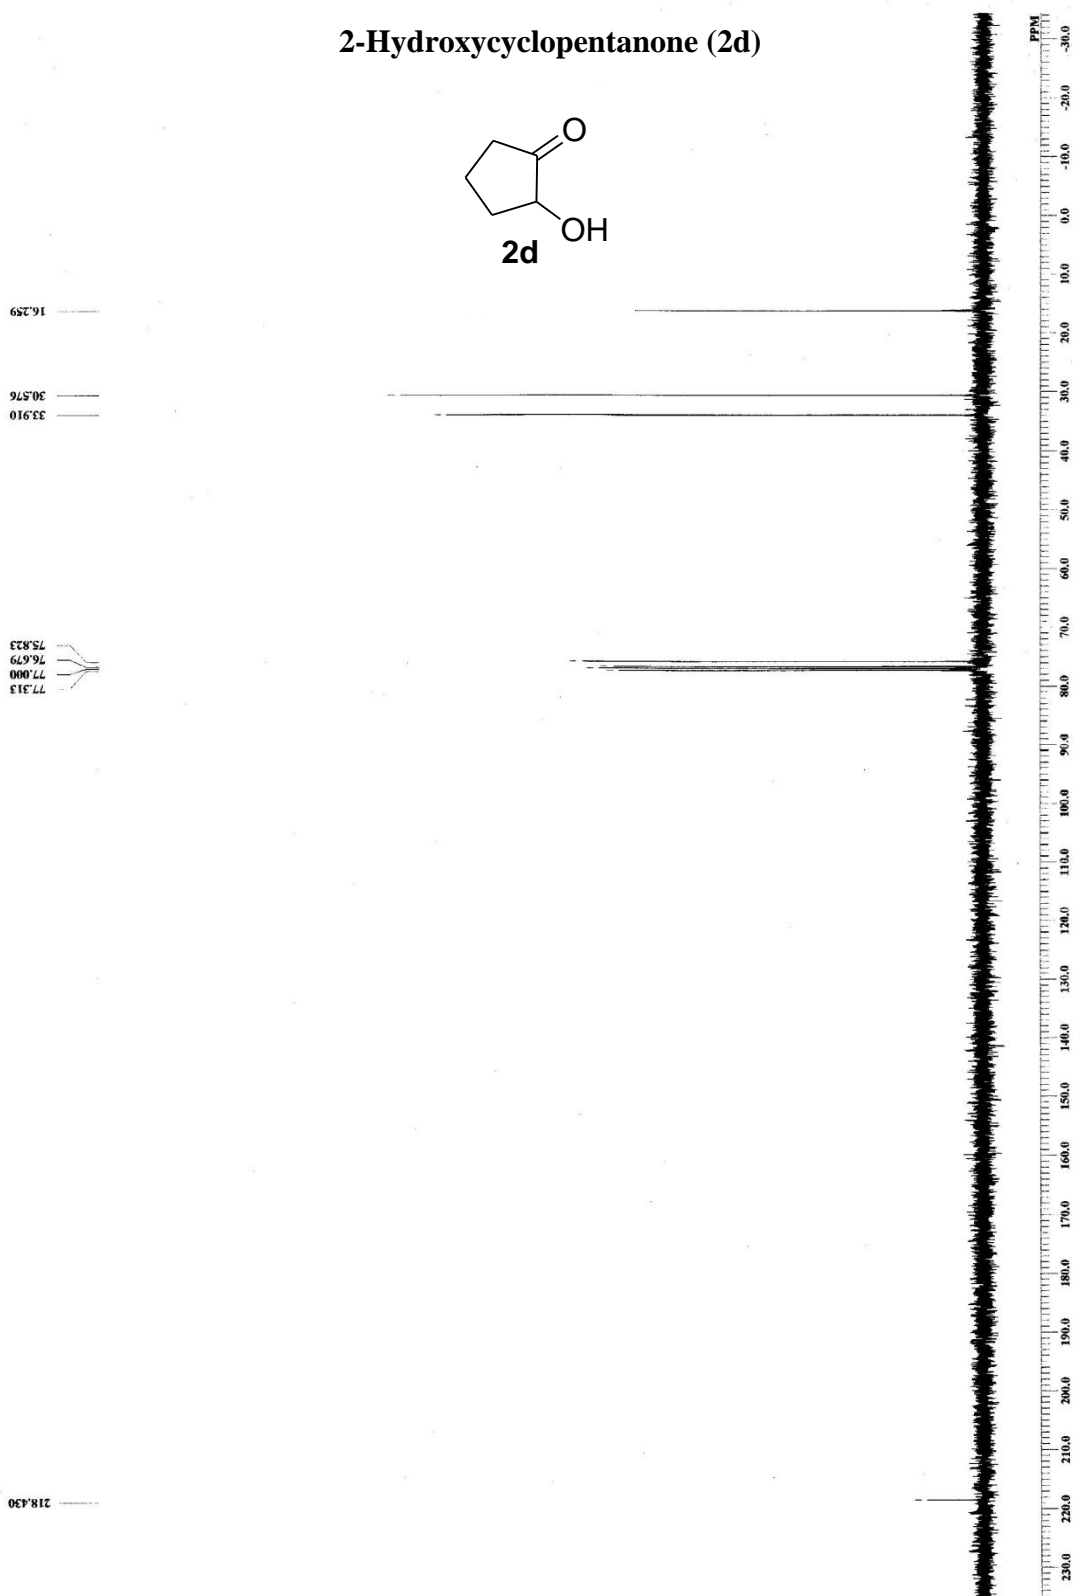

### Benzoin (2h)

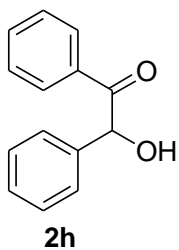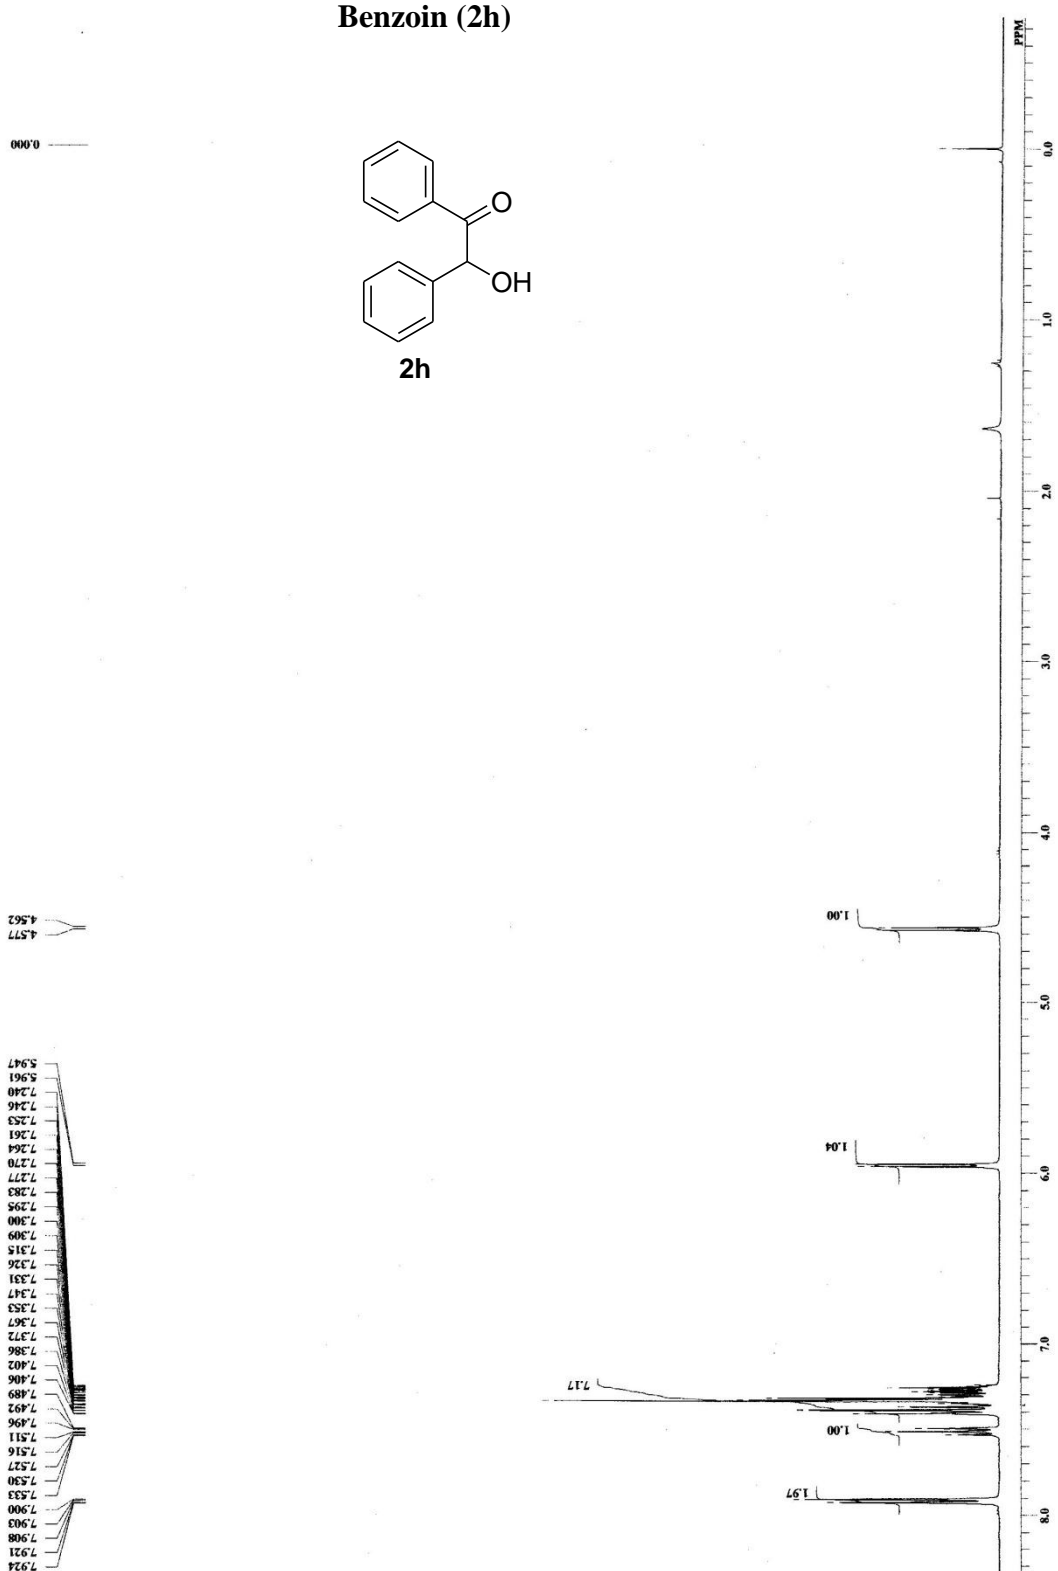

### Benzoin (2h)

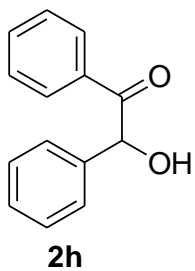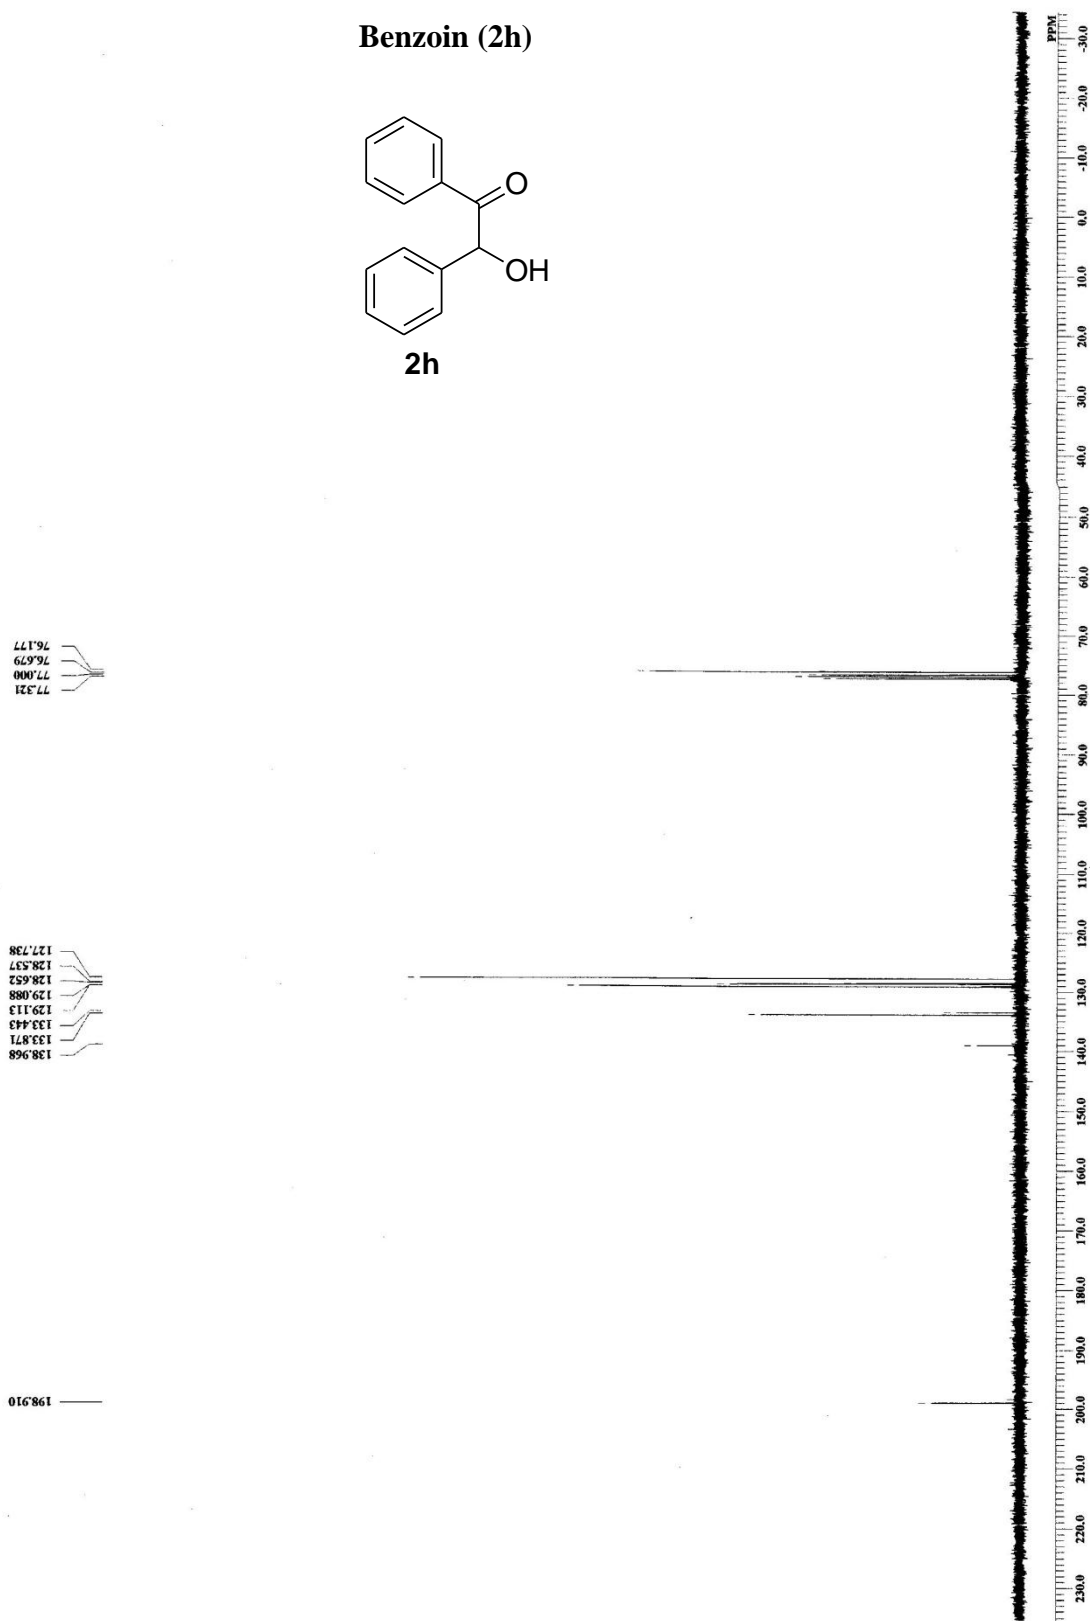

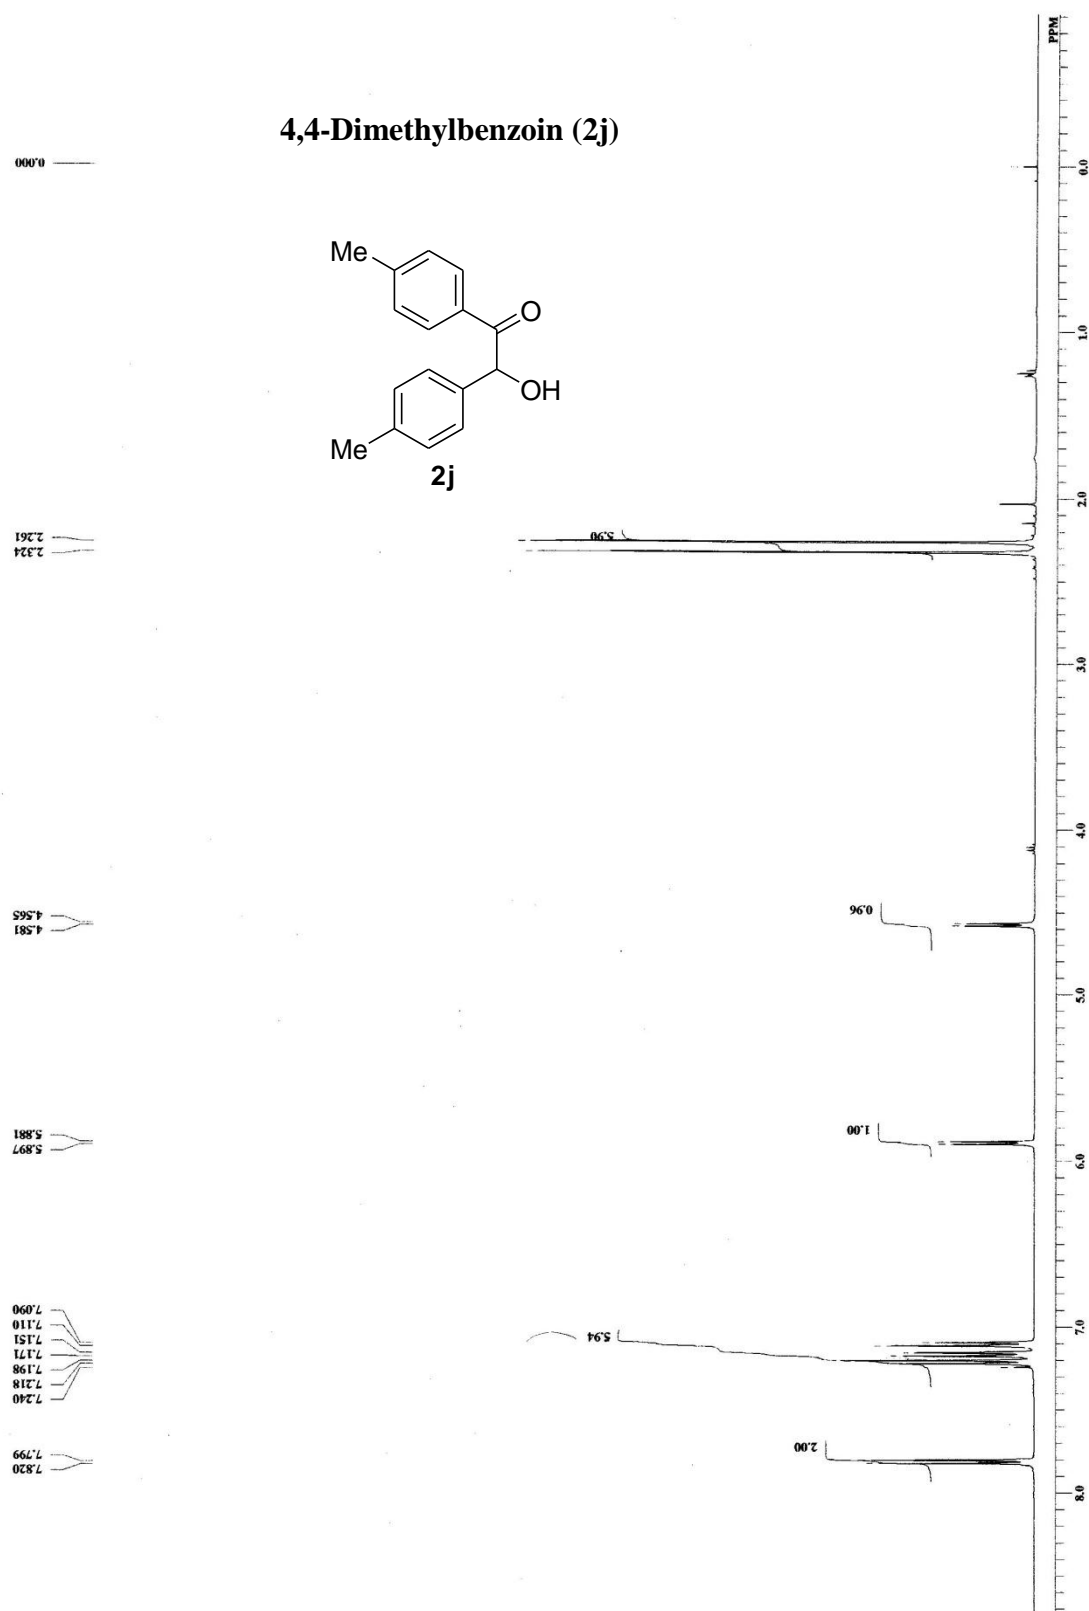

### 4,4-Dimethylbenzoin (2j)

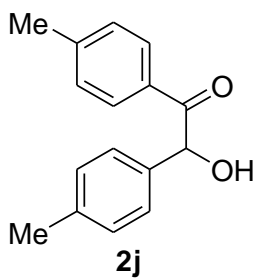

21.610  
21.051

75.716  
77.000  
77.313

127.565  
129.187  
129.269  
129.681  
130.883  
136.317  
138.210  
144.788

198.473

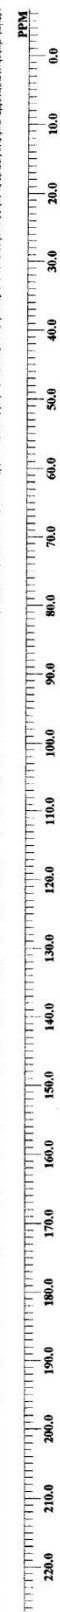



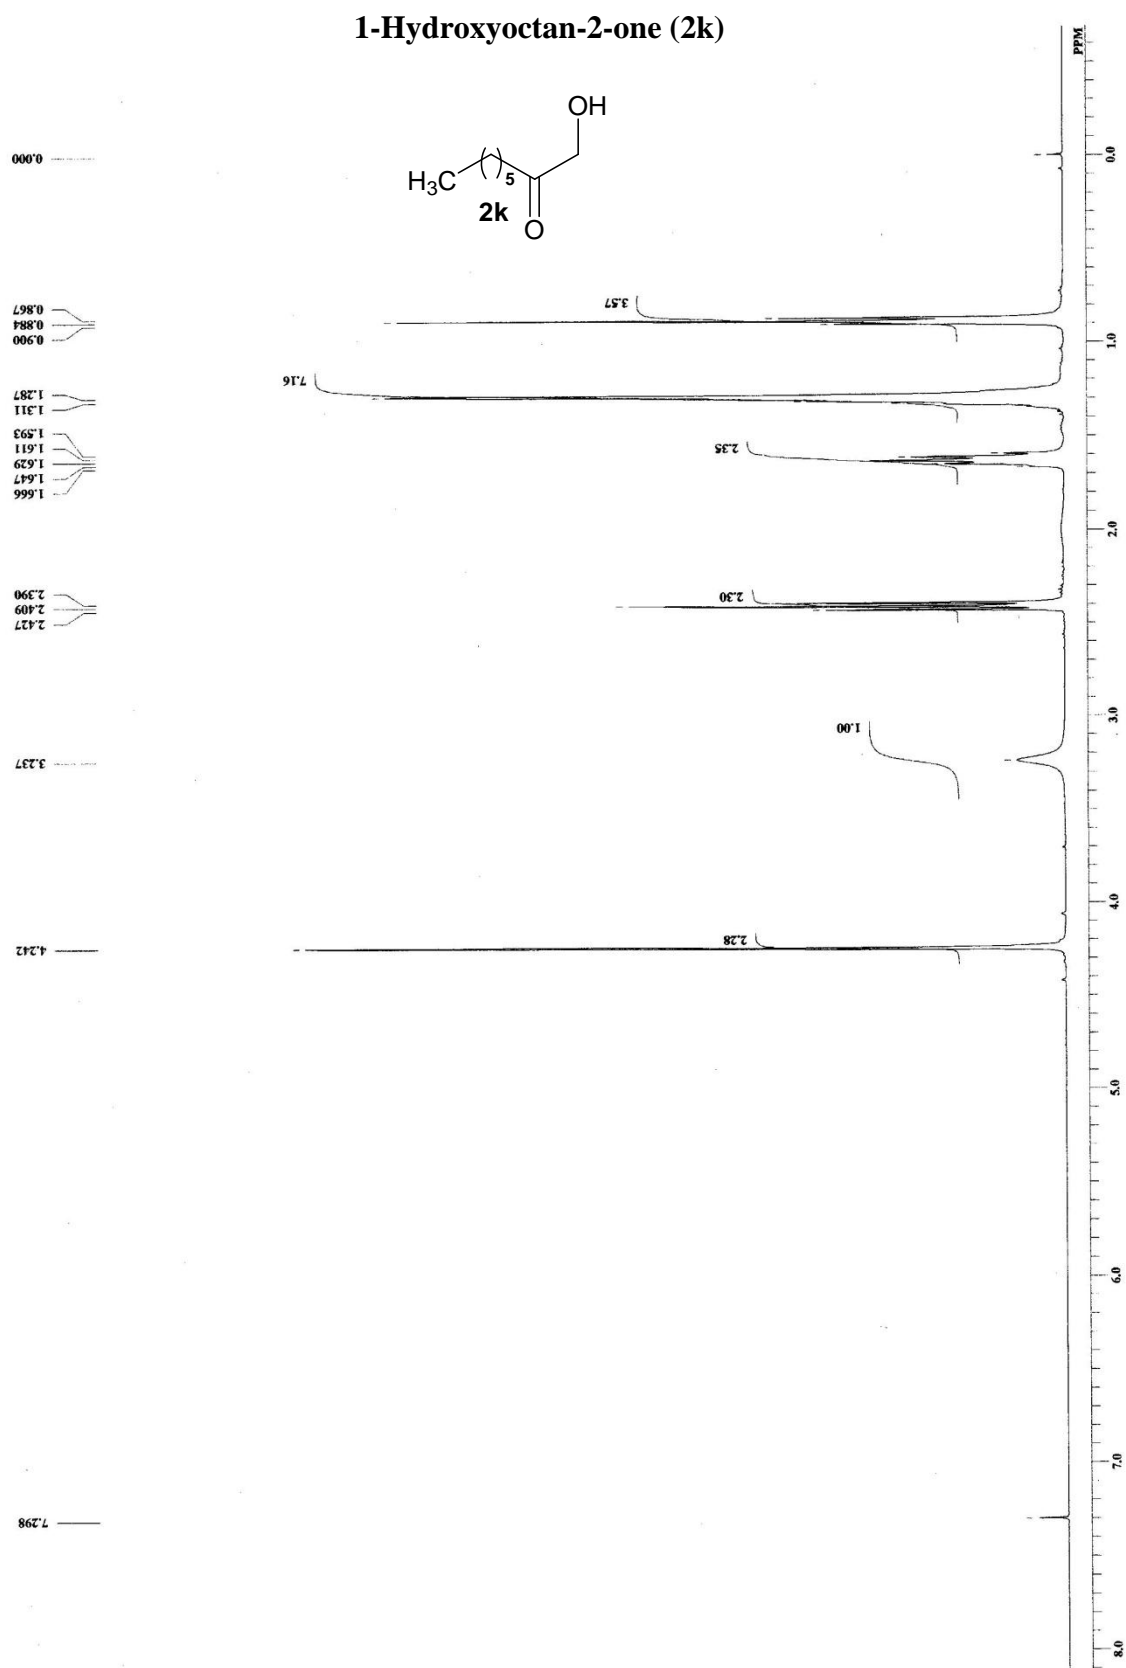

### 1-Hydroxyoctan-2-one (2k)

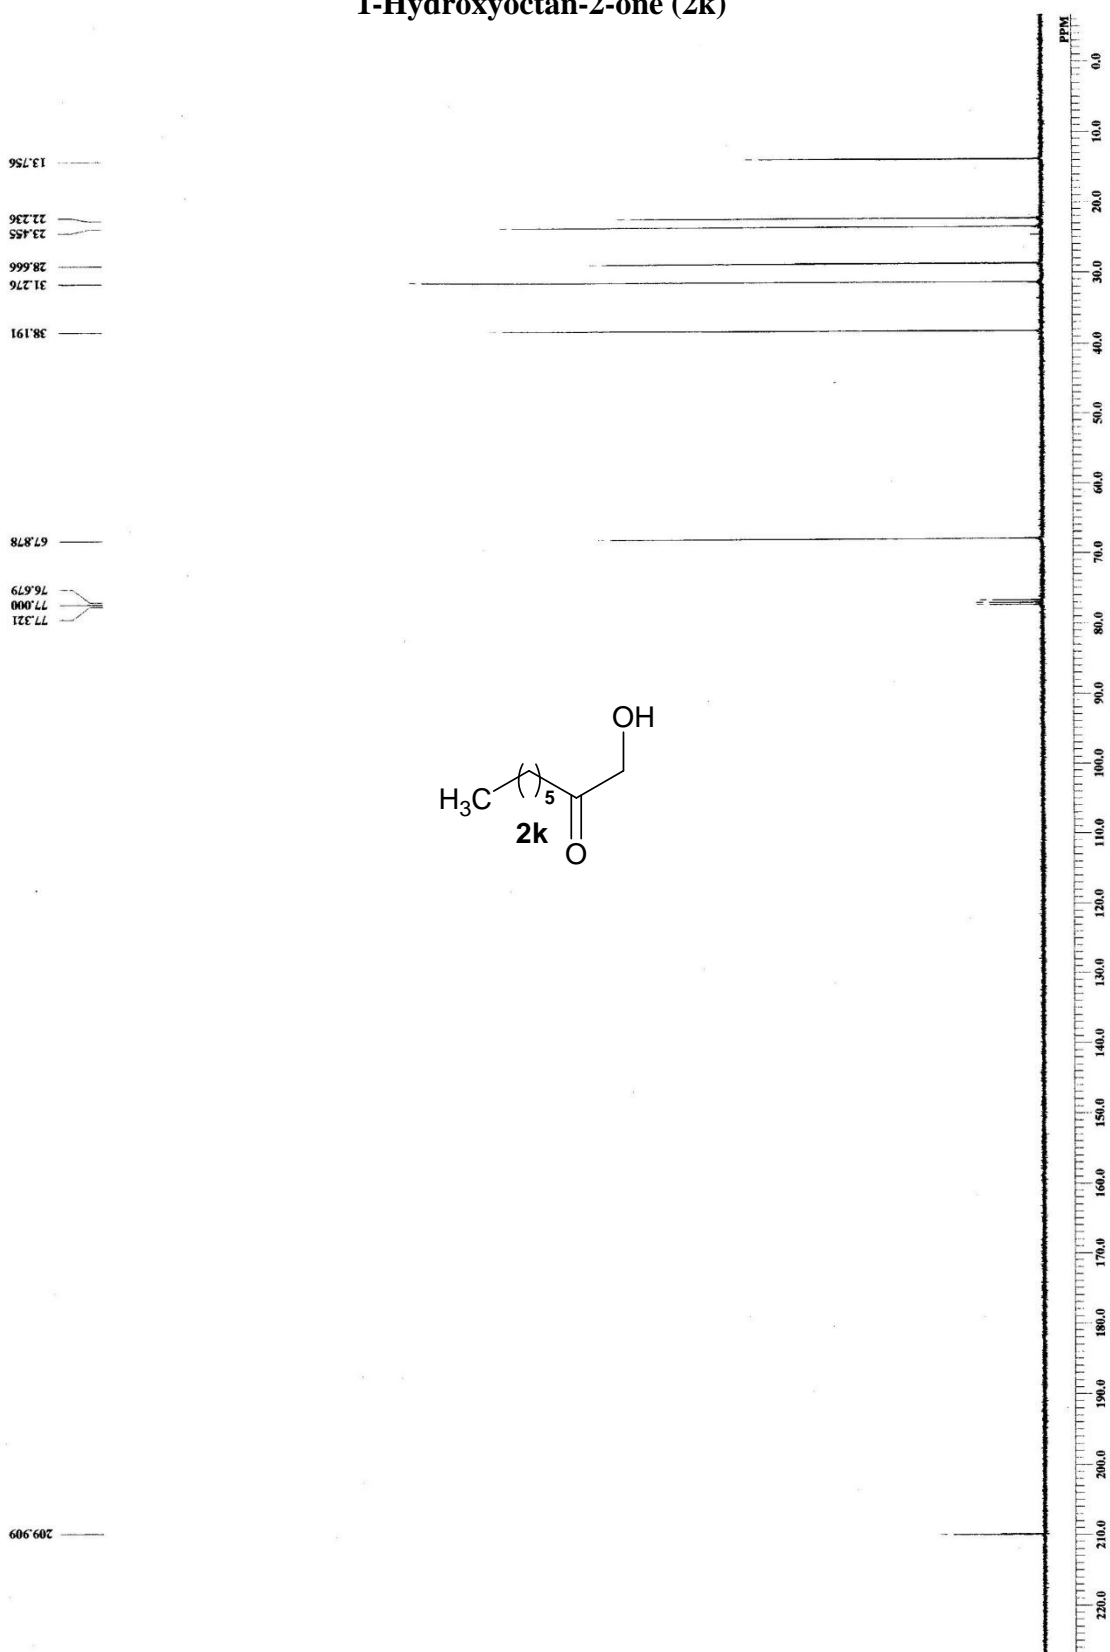

### 1-Hydroxydodecan-2-one (2l)

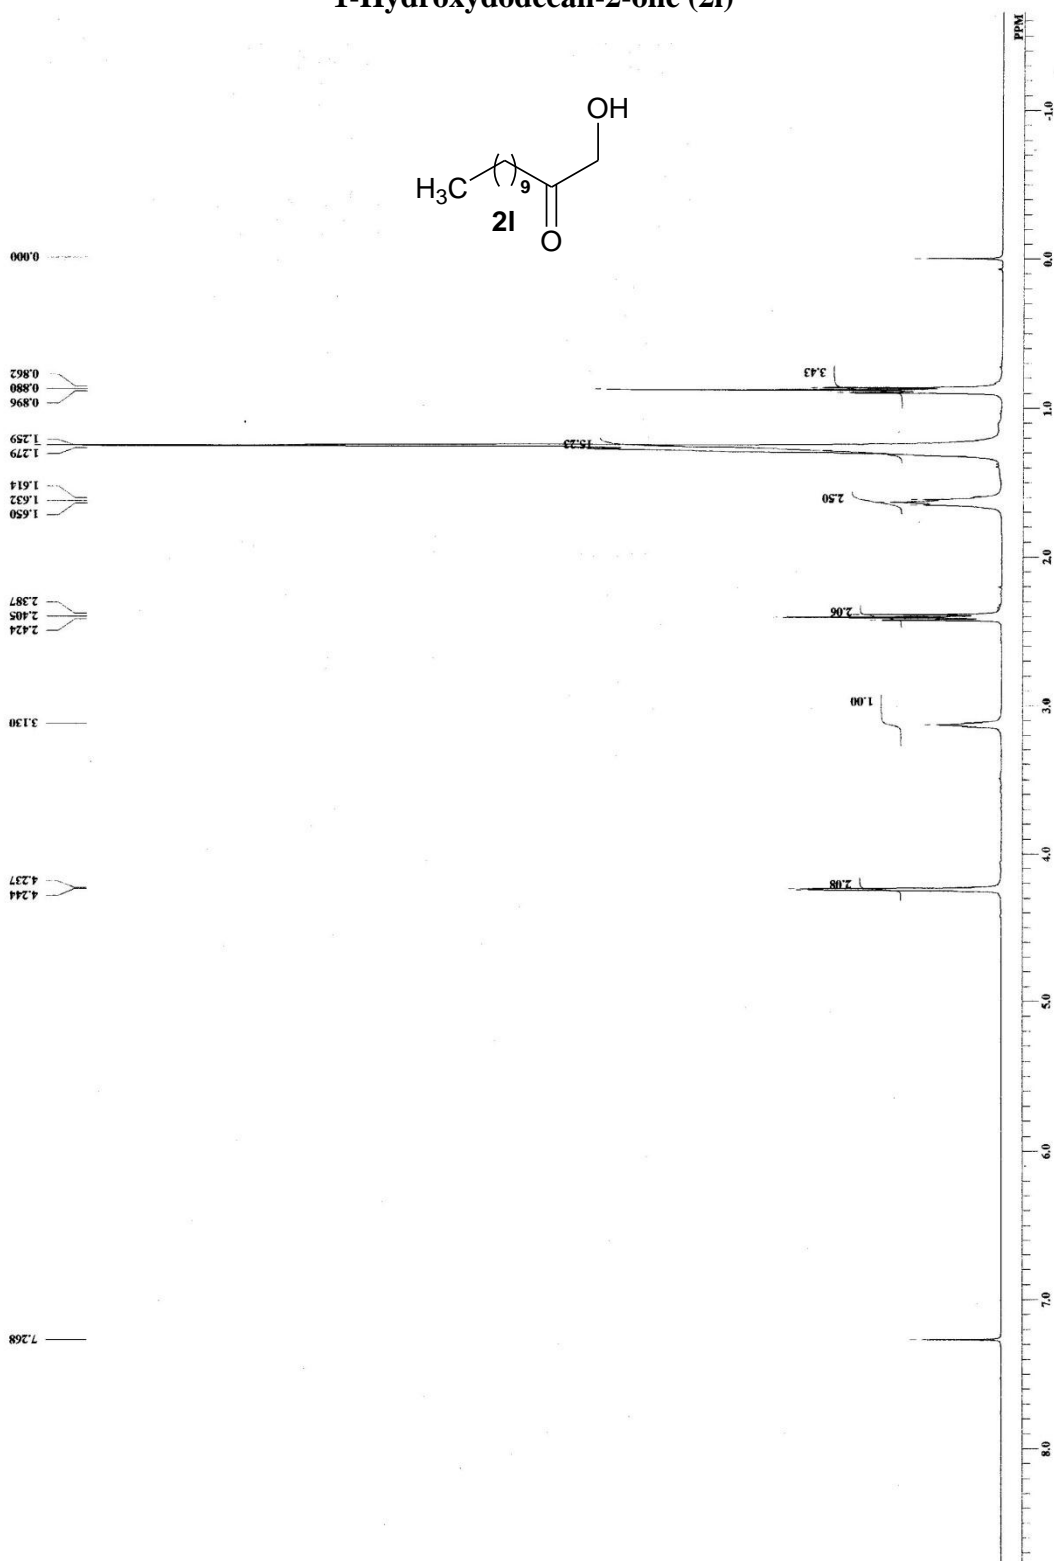

### 1-Hydroxydodecan-2-one (21)

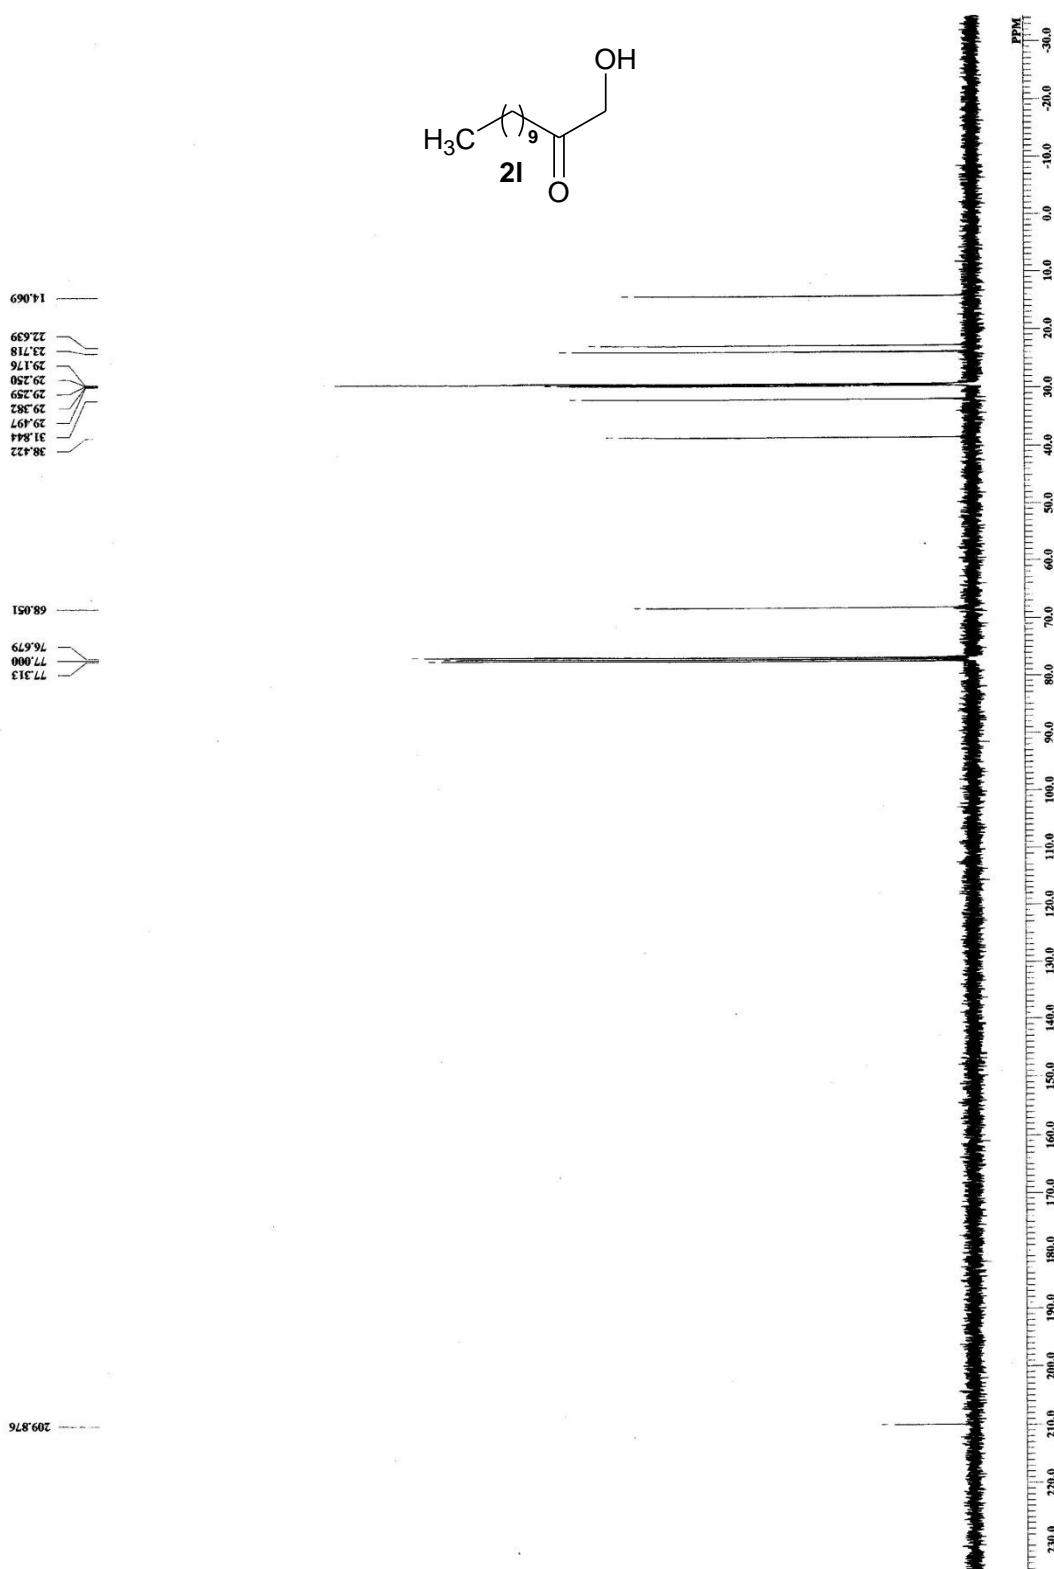

### 1-Hydroxyhexadecan-2-one (2m)

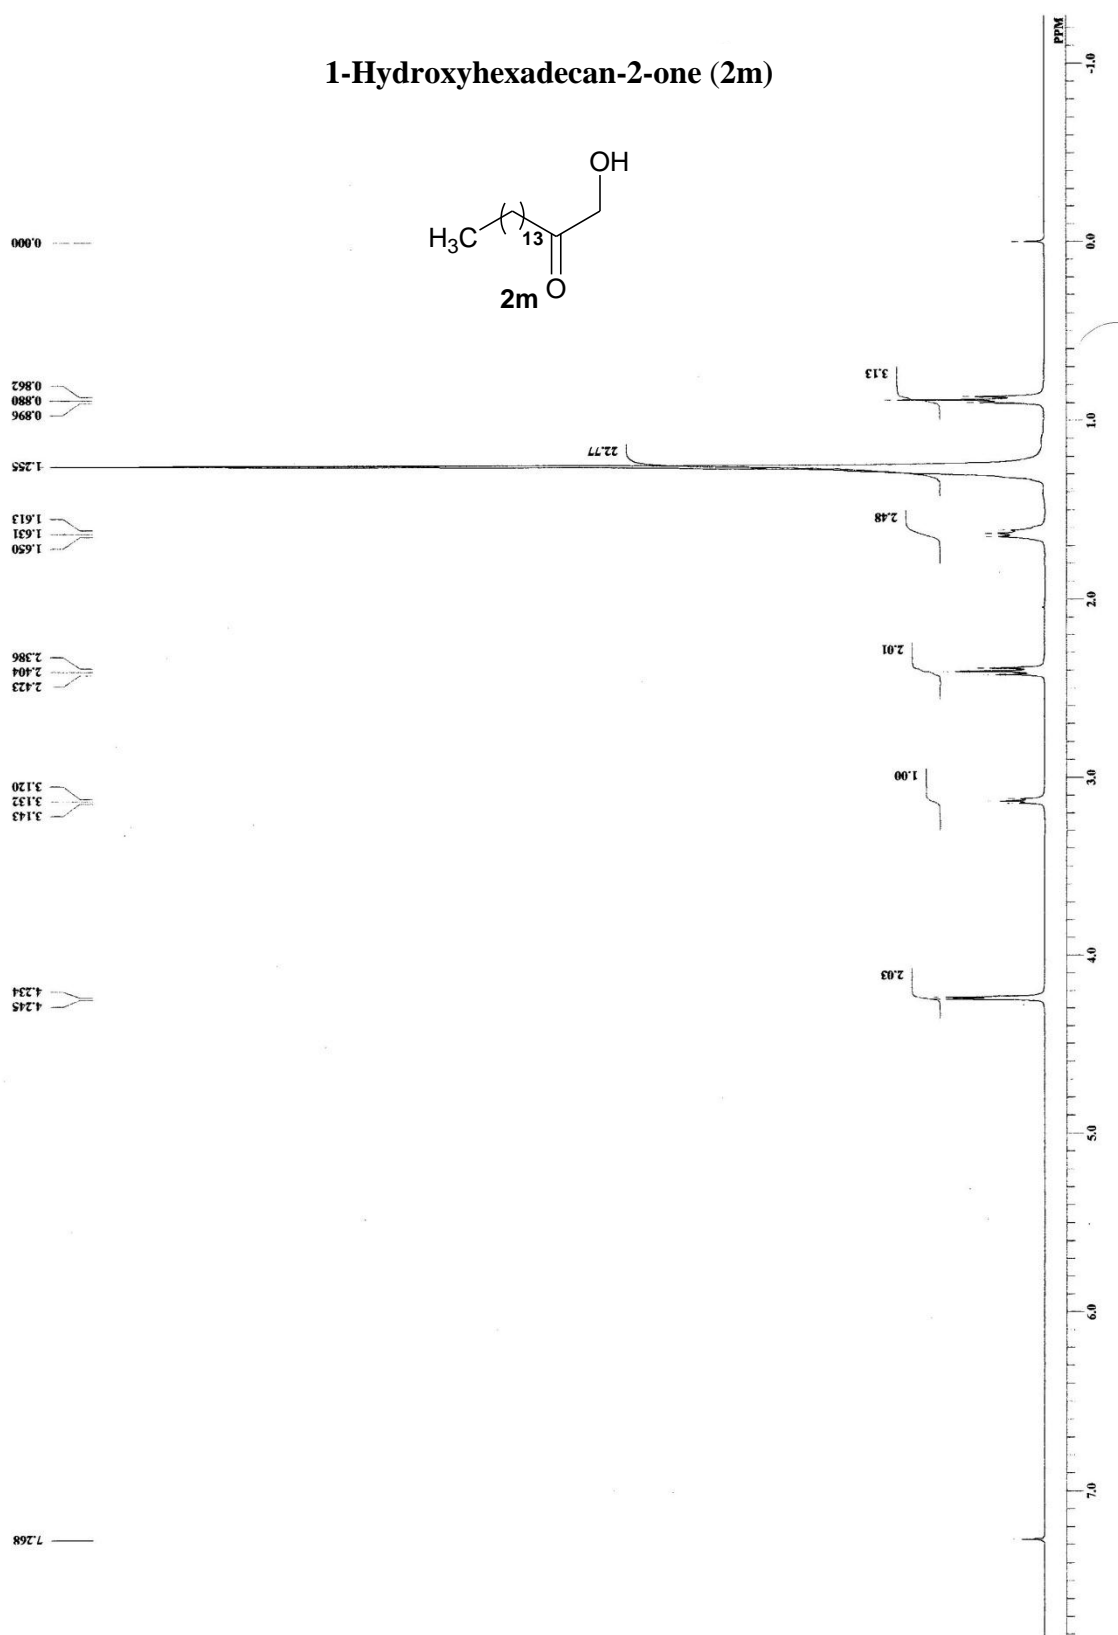

### 1-Hydroxyhexadecan-2-one (2m)

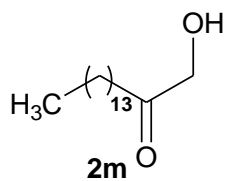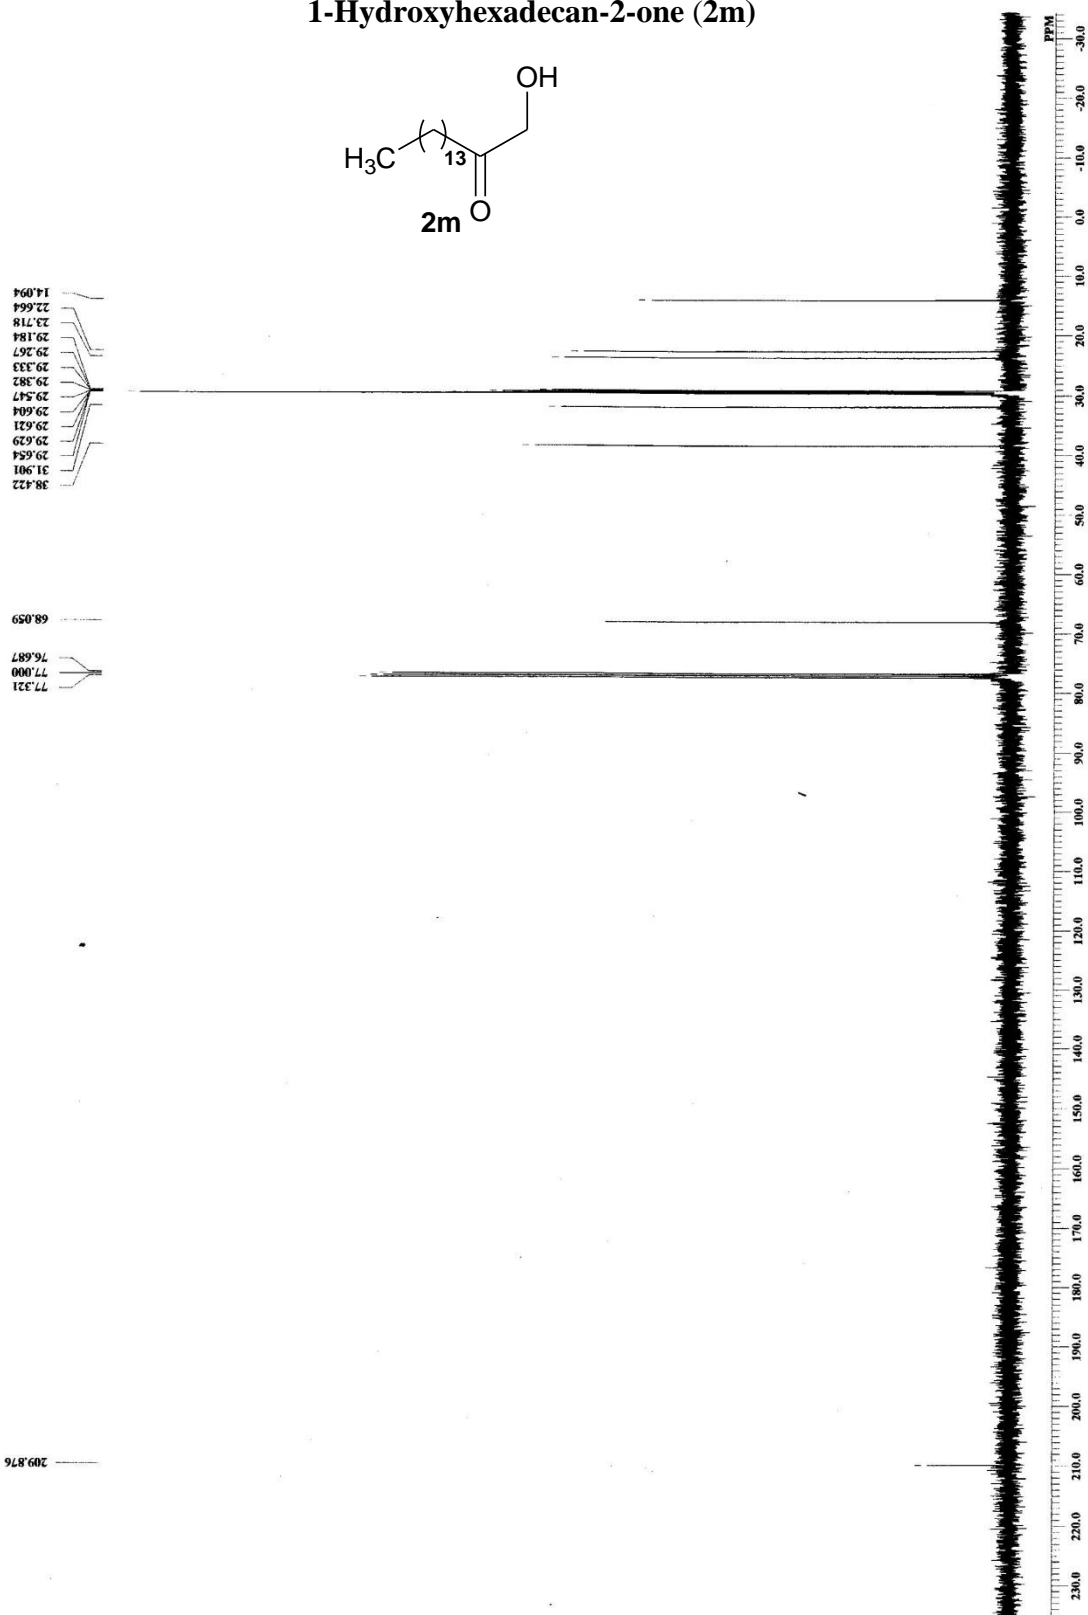

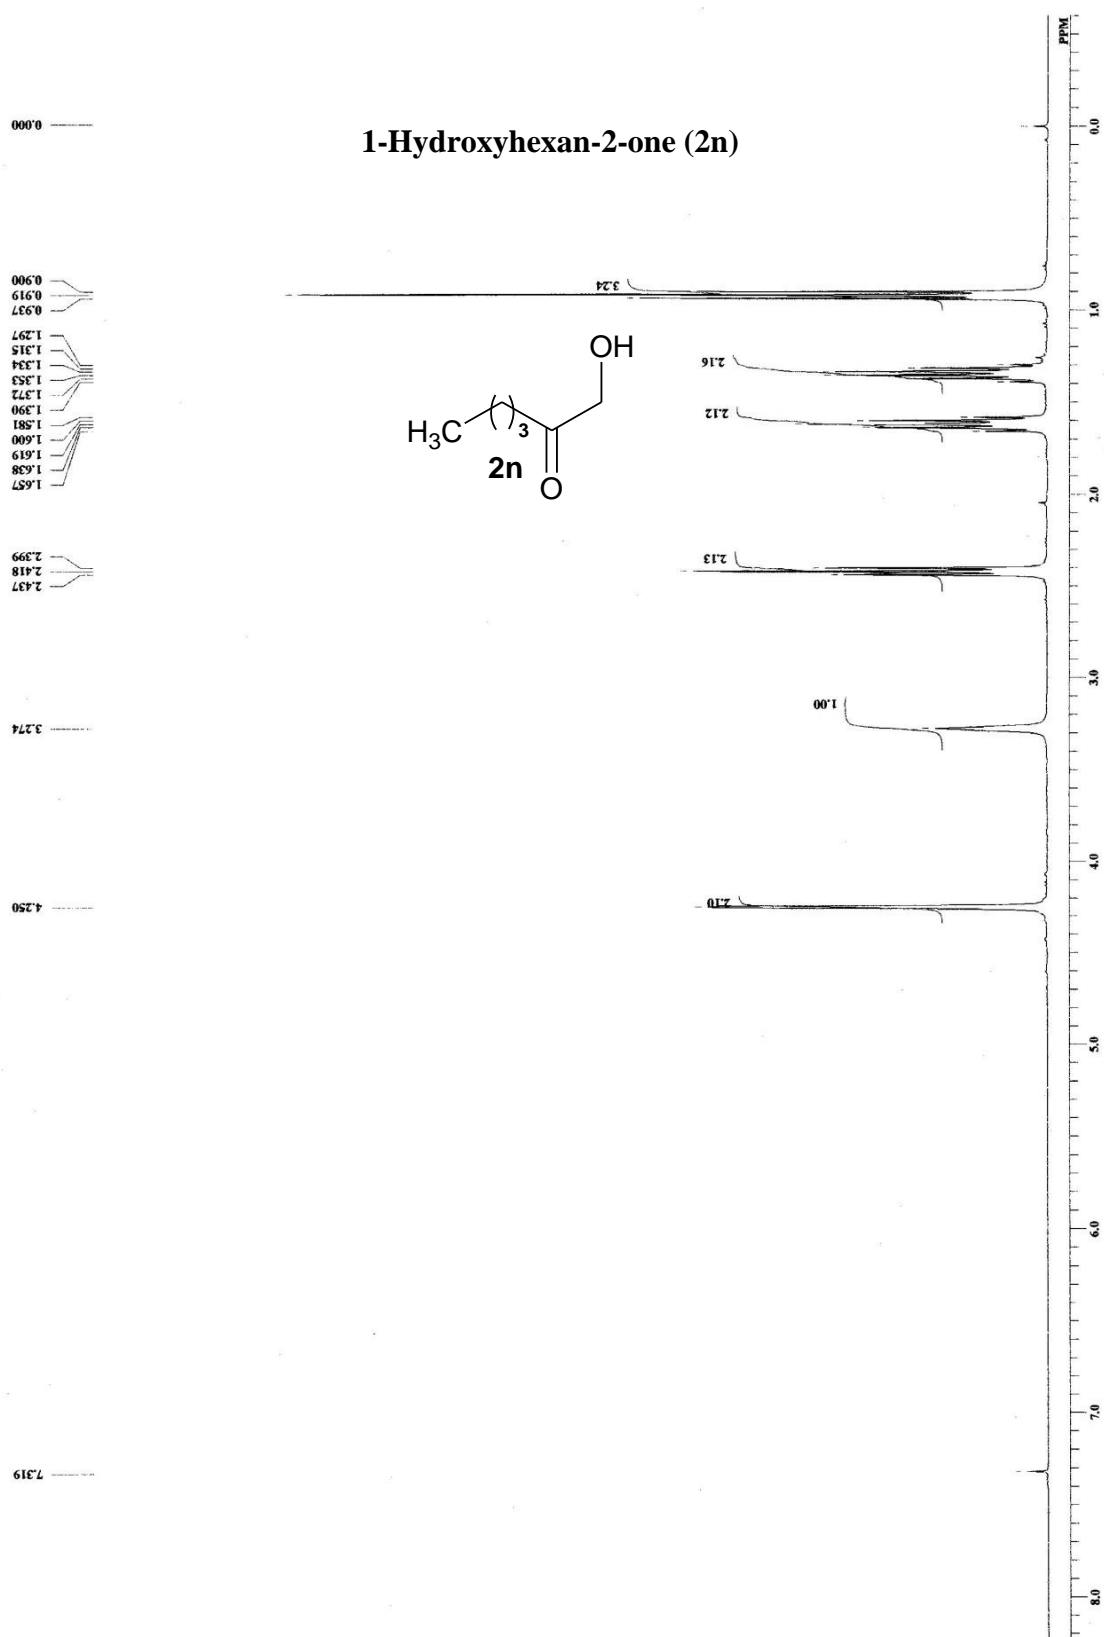

### 1-Hydroxyhexan-2-one (2n)

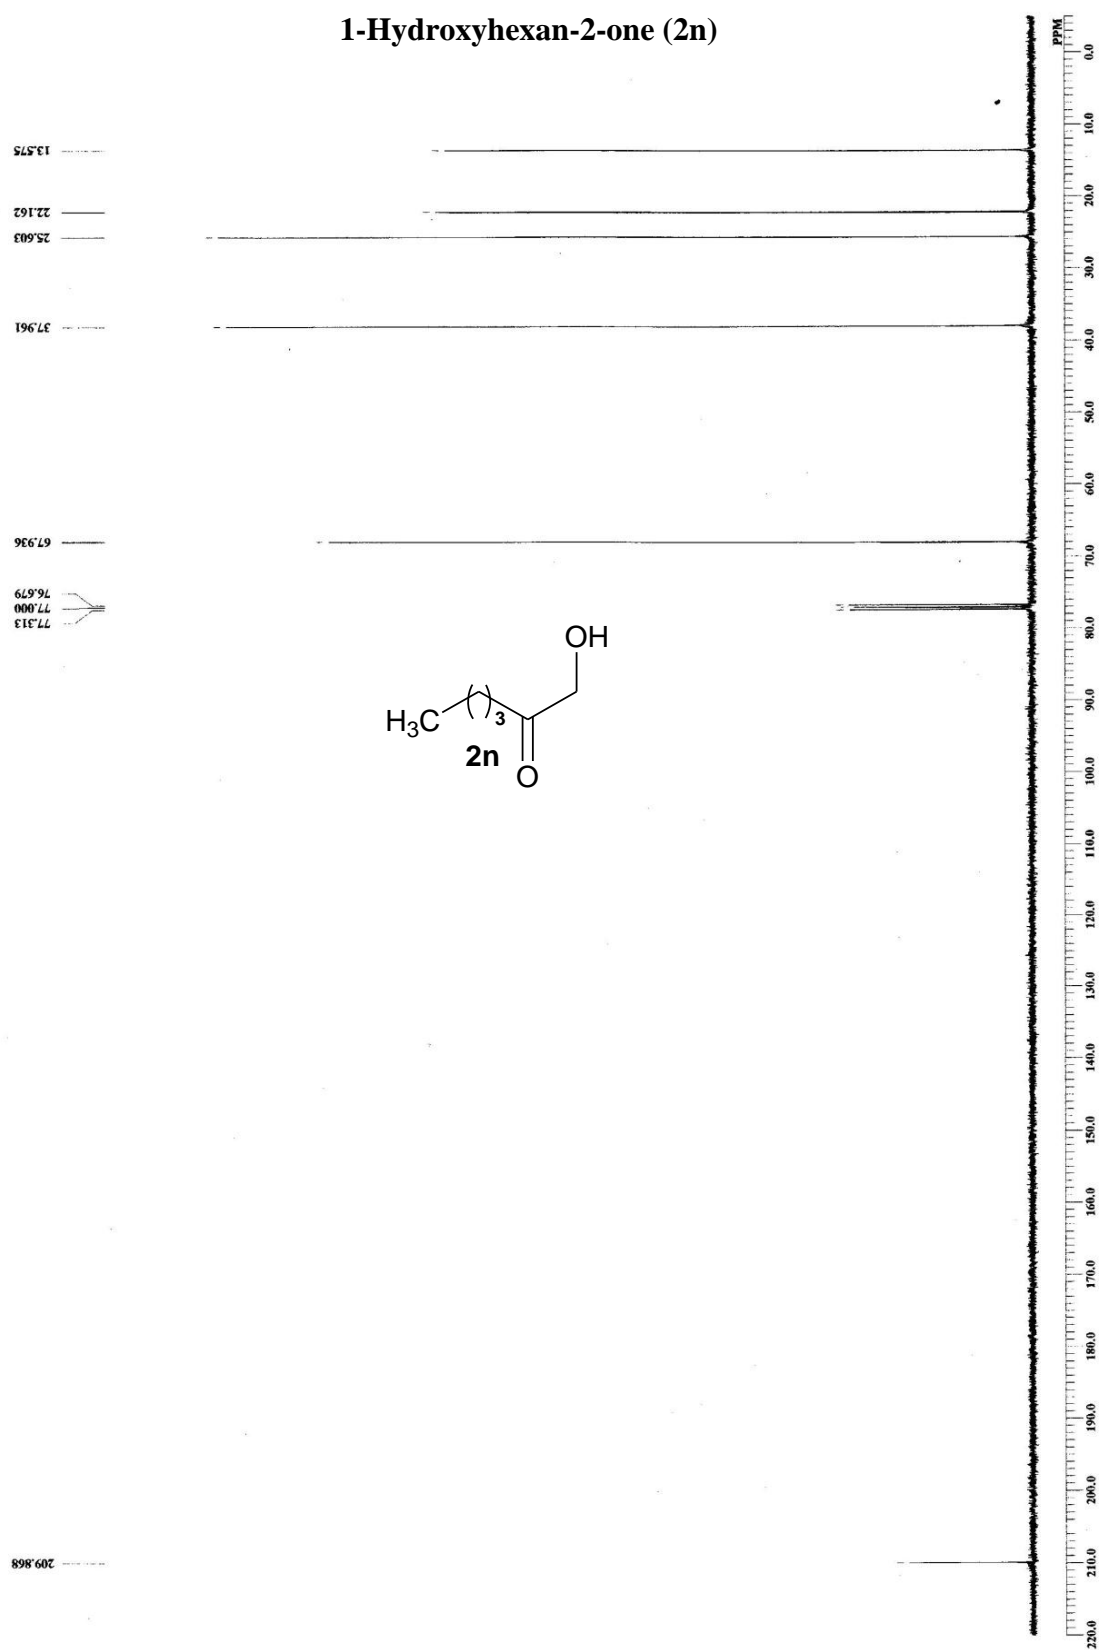



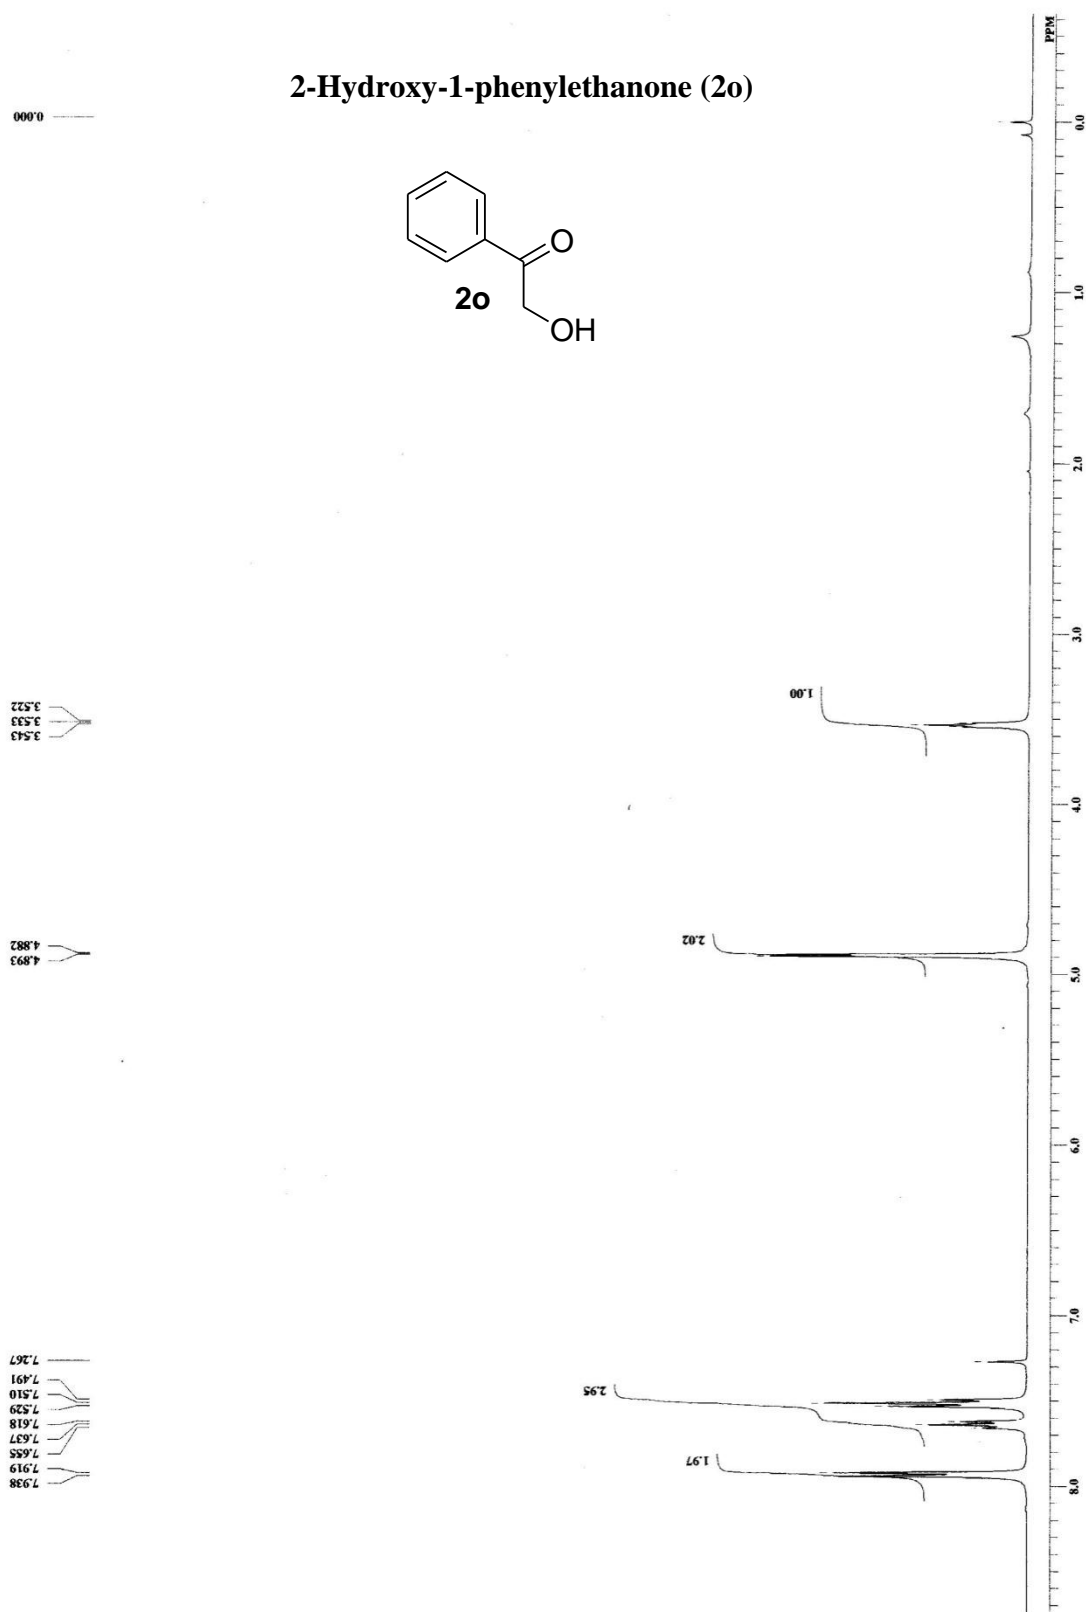

## 2-Hydroxy-1-phenylethanone (2o)

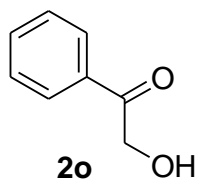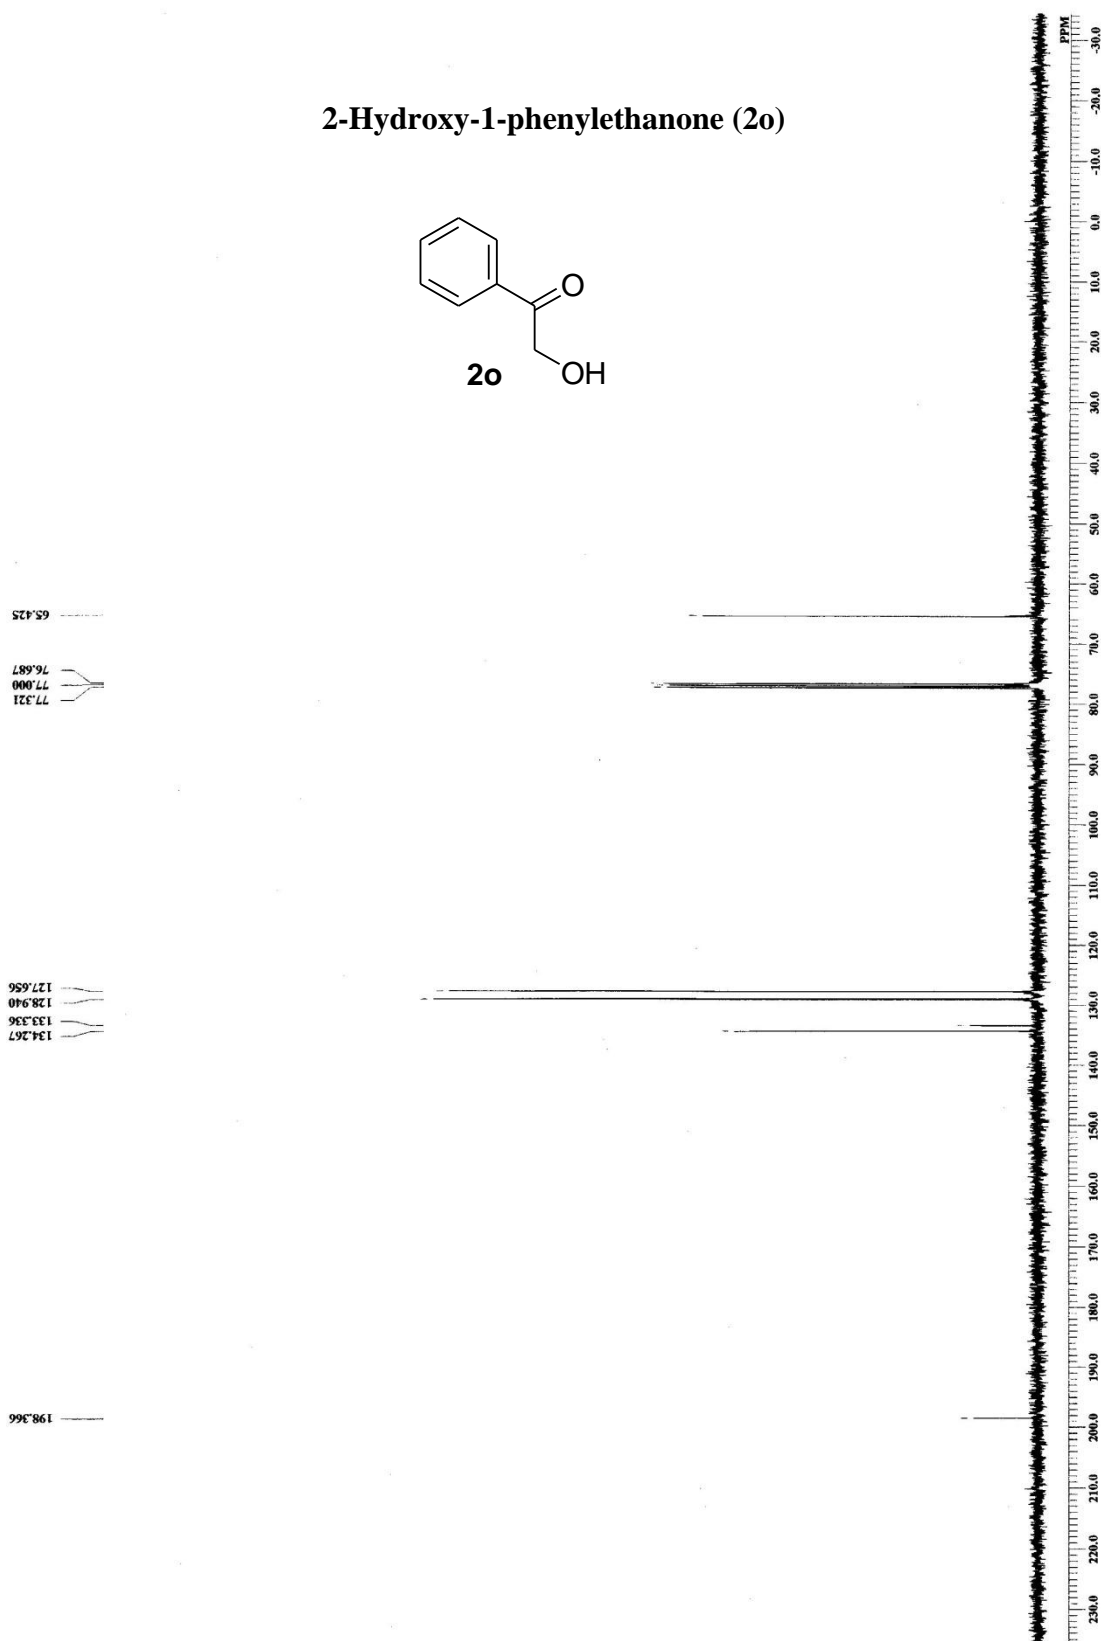

### 1,6-Dihydroxyhexan-2-one (2p) (mixture of open-chain and cyclic form)

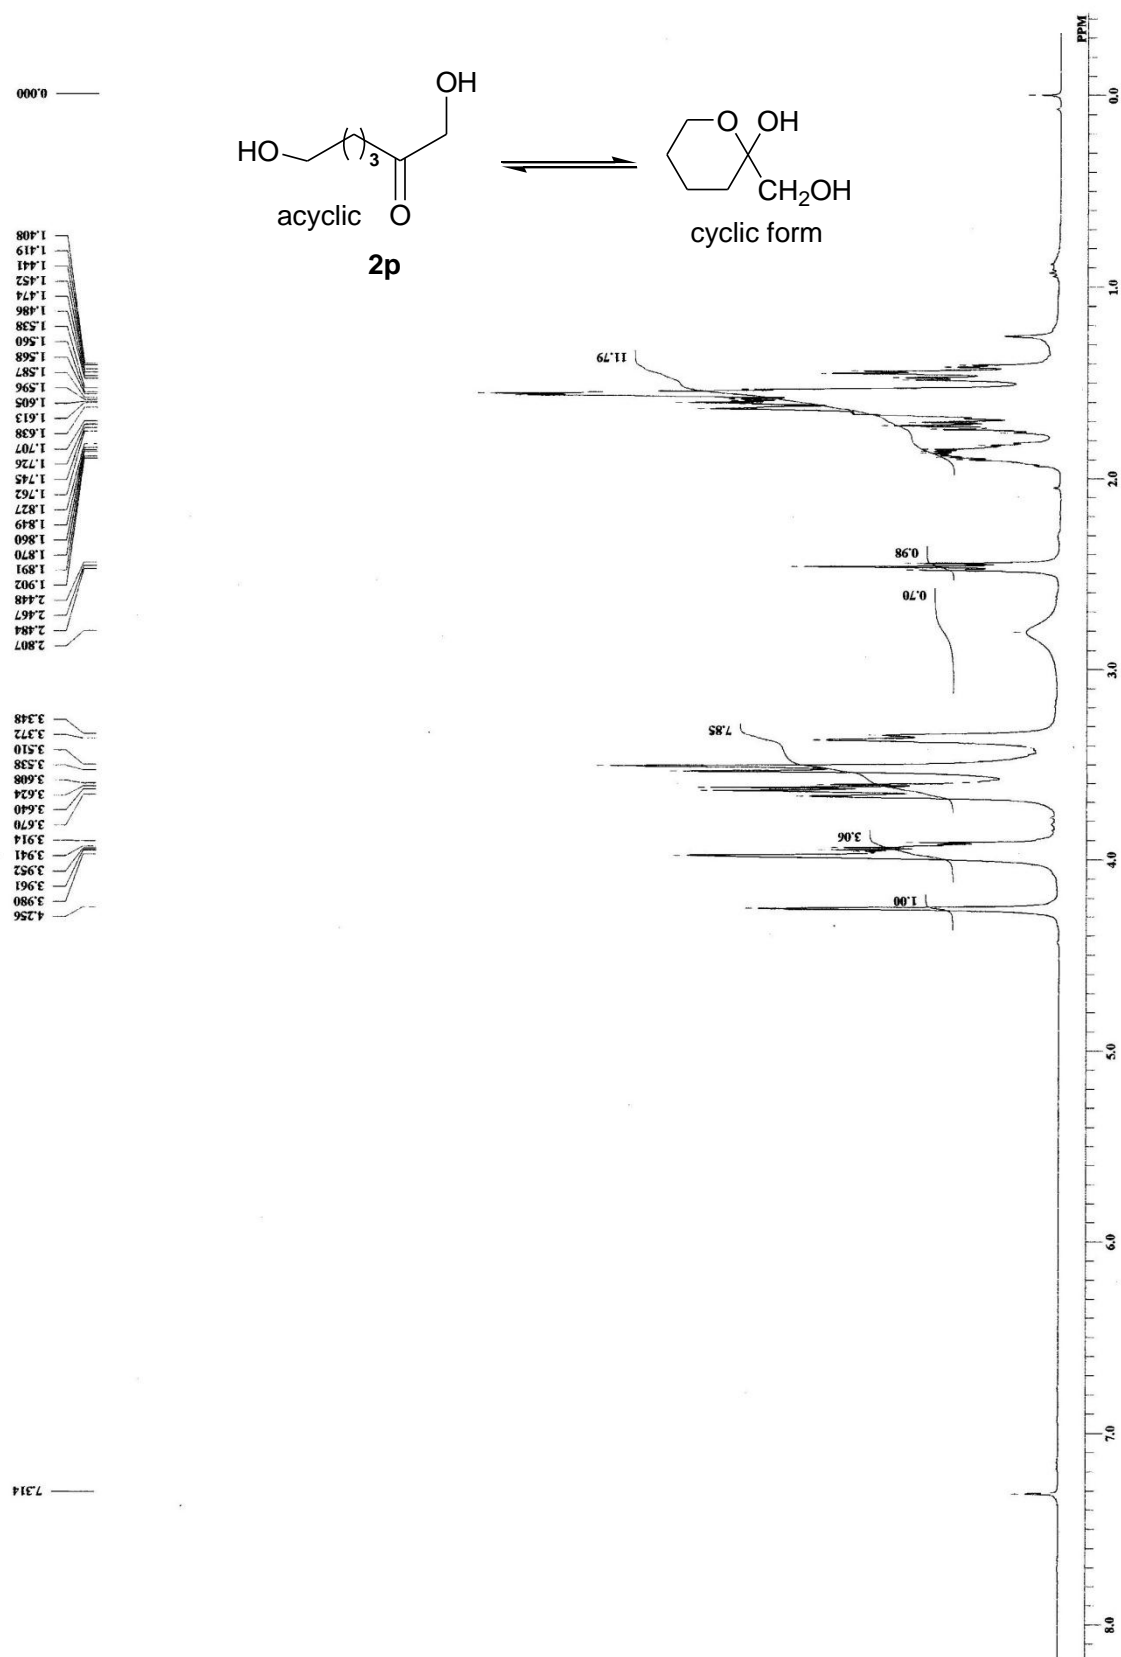

### 1,6-Dihydroxyhexan-2-one (2p) (mixture of open-chain and cyclic form)

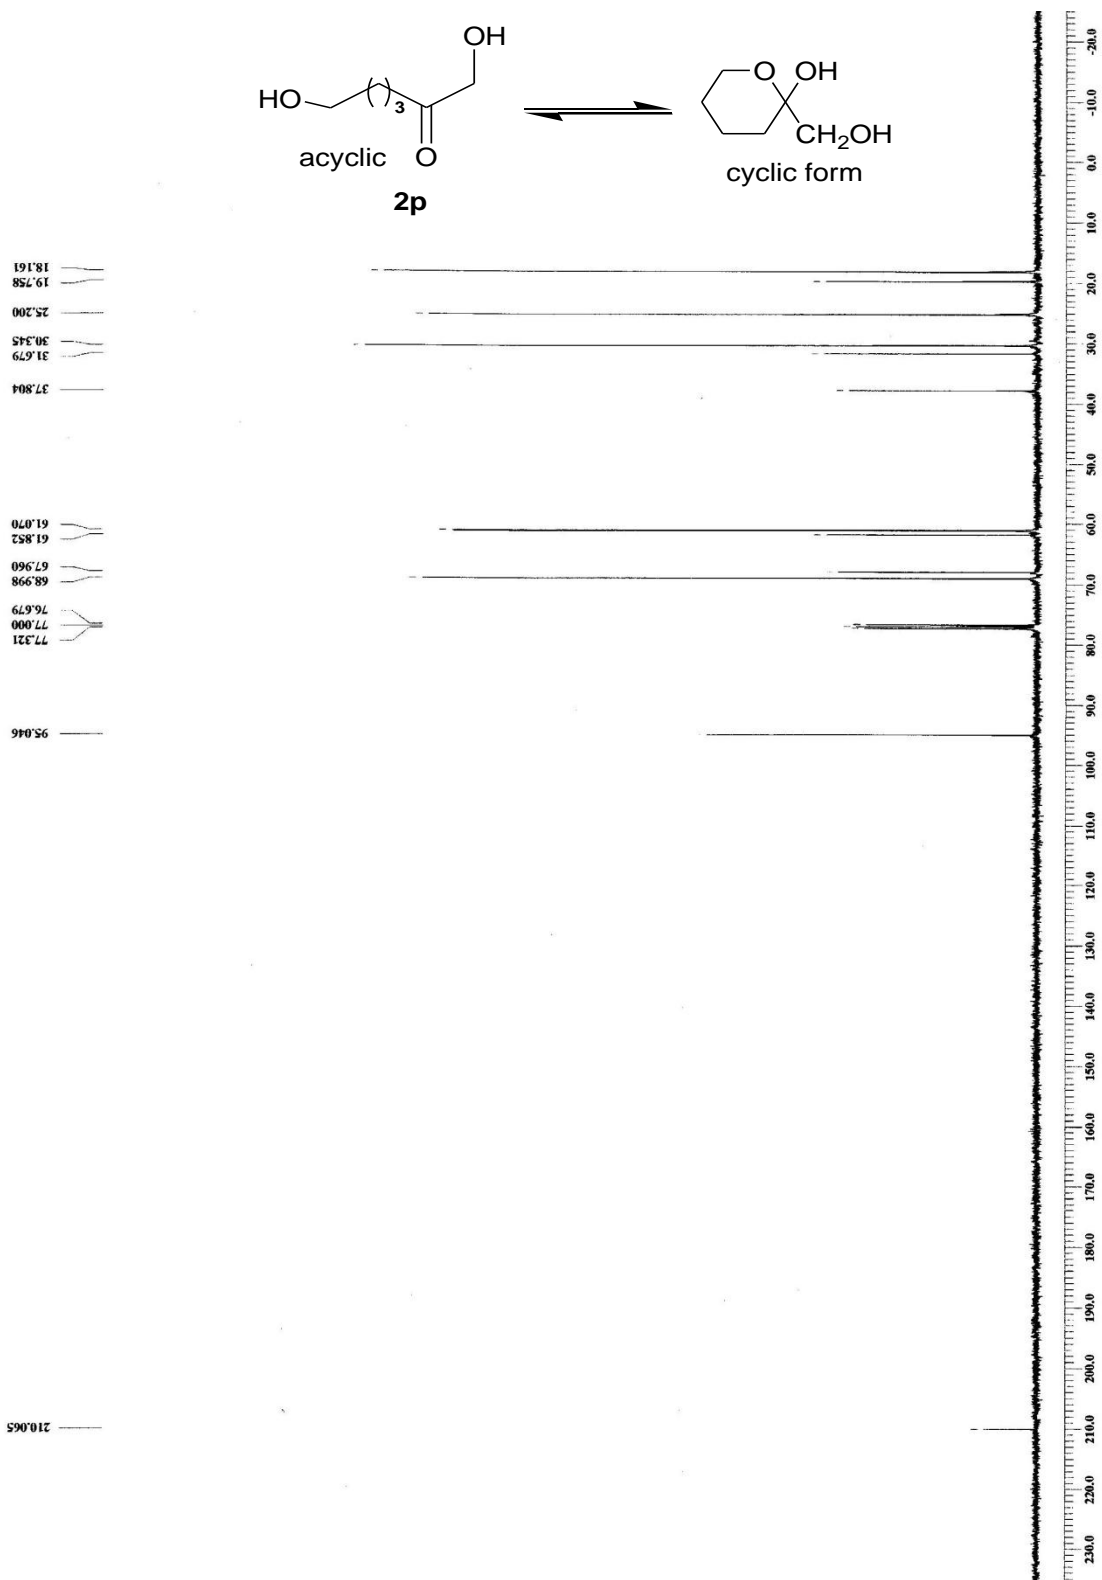

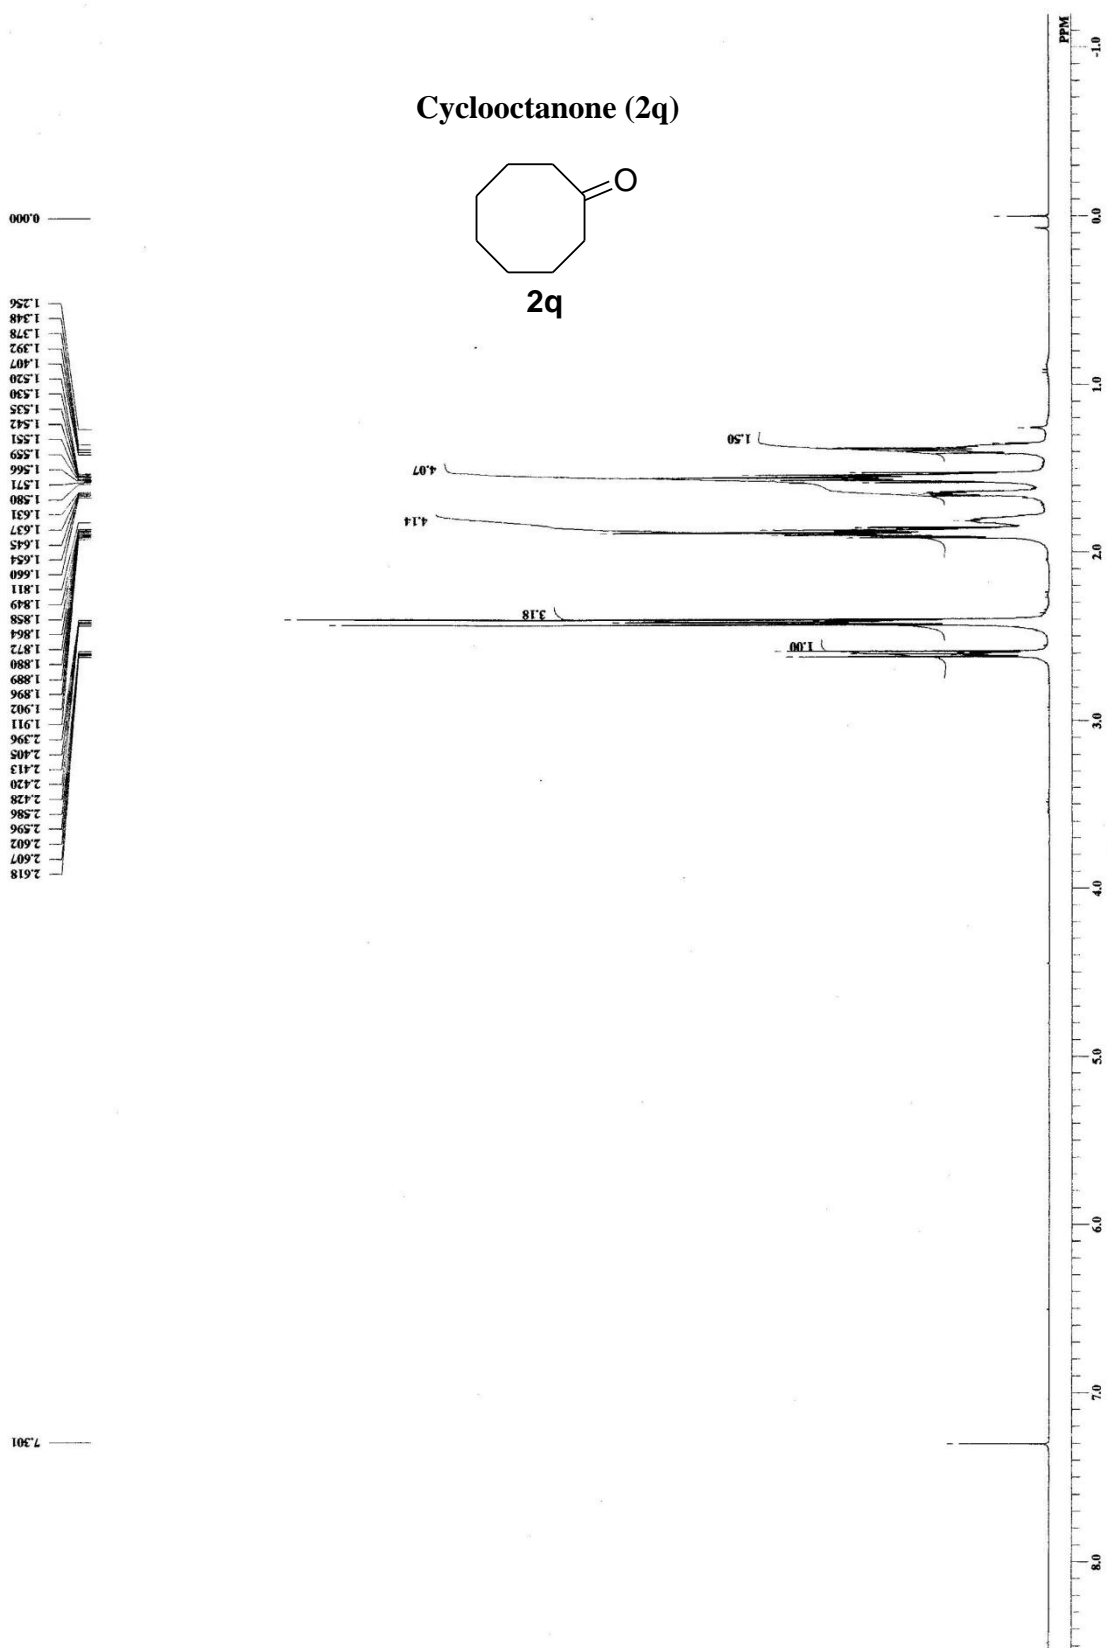

### Cyclooctanone (2q)

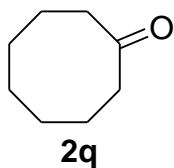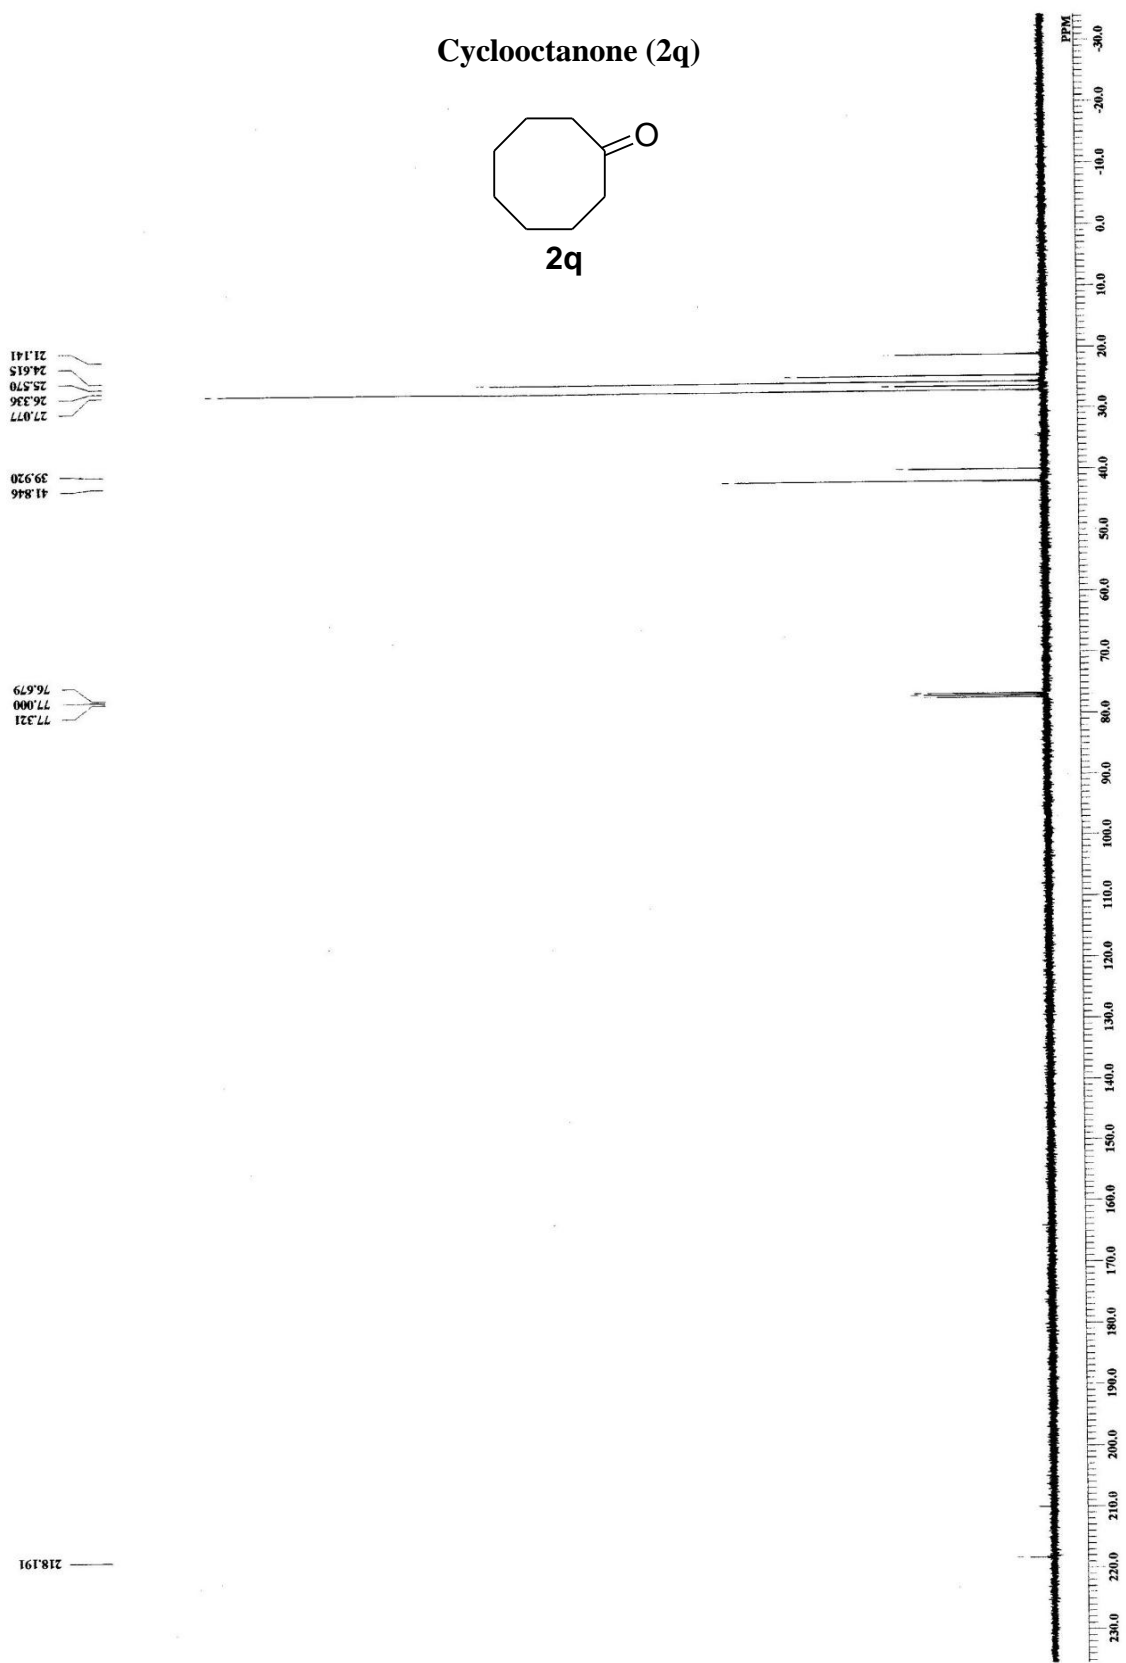

Supplement: c3ra42754d.pdf [file c3ra42754d.pdf]
